# Supplementary material for: Piperaquine-resistant PfCRT mutations differentially impact drug transport, hemoglobin catabolism and parasite physiology in Plasmodium falciparum asexual blood stages
Source: PubMed Central journal article supplement (PMC9645663; doi:10.1371/journal.ppat.1010926), 2022-10-28
Supplement: ppat.1010926.s006.pdf [file ppat.1010926.s006.pdf]

# S6 Figure

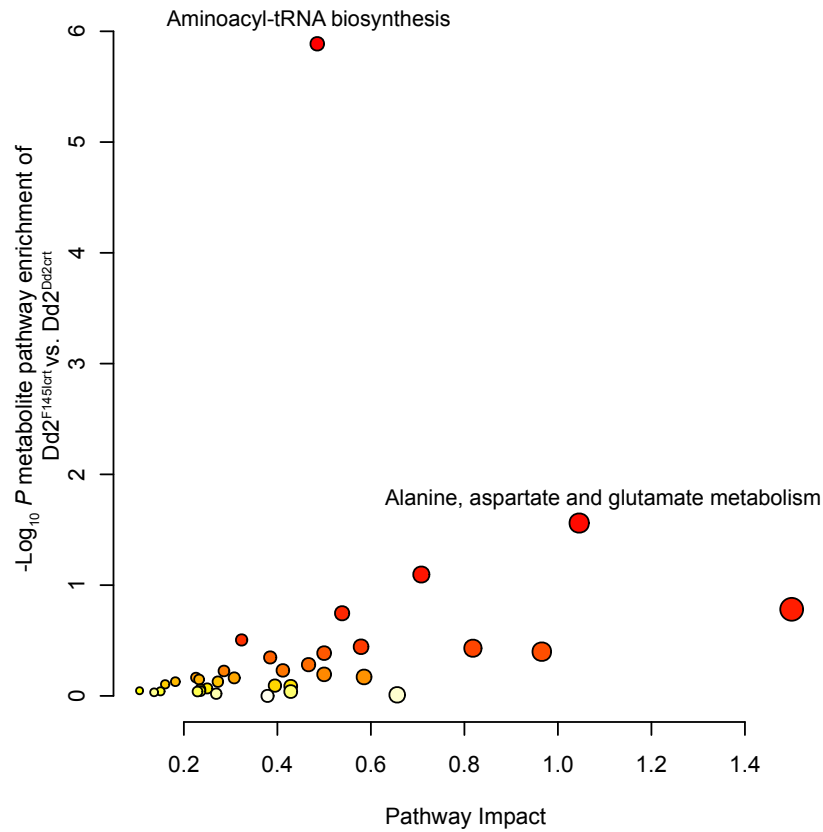

| Pathway                                     | Total | Expected | Hits | Raw p    | $-\log_{10}(p)$ | Holm adjust | FDR      | Impact |
|---------------------------------------------|-------|----------|------|----------|-----------------|-------------|----------|--------|
| Aminoacyl-tRNA biosynthesis                 | 69    | 7.34     | 21   | 1.30E-06 | 5.89            | 6.48E-05    | 6.48E-05 | 0.49   |
| Alanine, aspartate and glutamate metabolism | 23    | 2.45     | 6    | 0.027506 | 1.56            | 1           | 0.68766  | 1.05   |
| Purine metabolism                           | 90    | 9.58     | 14   | 0.080213 | 1.10            | 1           | 1        | 0.71   |
| Nitrogen metabolism                         | 7     | 0.75     | 2    | 0.16524  | 0.78            | 1           | 1        | 1.50   |
| Nicotinate and nicotinamide metabolism      | 14    | 1.49     | 3    | 0.17939  | 0.75            | 1           | 1        | 0.54   |
| Glutathione metabolism                      | 35    | 3.73     | 5    | 0.31241  | 0.51            | 1           | 1        | 0.32   |
| Glyoxylate and dicarboxylate metabolism     | 20    | 2.13     | 3    | 0.35997  | 0.44            | 1           | 1        | 0.58   |
| Arginine biosynthesis                       | 12    | 1.28     | 2    | 0.37107  | 0.43            | 1           | 1        | 0.82   |
| Pentose phosphate pathway                   | 30    | 3.19     | 4    | 0.39867  | 0.40            | 1           | 1        | 0.97   |
| Lysine degradation                          | 13    | 1.38     | 2    | 0.41089  | 0.39            | 1           | 1        | 0.50   |
| Selenocompound metabolism                   | 14    | 1.49     | 2    | 0.44947  | 0.35            | 1           | 1        | 0.38   |
| Glycine, serine and threonine metabolism    | 16    | 1.70     | 2    | 0.52223  | 0.28            | 1           | 1        | 0.47   |
| Arginine and proline metabolism             | 18    | 1.92     | 2    | 0.58841  | 0.23            | 1           | 1        | 0.41   |
| Phosphonate and phosphinate metabolism      | 8     | 0.85     | 1    | 0.59548  | 0.23            | 1           | 1        | 0.29   |
| Starch and sucrose metabolism               | 9     | 0.96     | 1    | 0.63903  | 0.19            | 1           | 1        | 0.50   |
| Glycolysis or Gluconeogenesis               | 42    | 4.47     | 4    | 0.67425  | 0.17            | 1           | 1        | 0.59   |
| Porphyrin and chlorophyll metabolism        | 32    | 3.41     | 3    | 0.68268  | 0.17            | 1           | 1        | 0.23   |
| Pyrimidine metabolism                       | 53    | 5.64     | 5    | 0.68728  | 0.16            | 1           | 1        | 0.31   |
| Glycerophospholipid metabolism              | 44    | 4.68     | 4    | 0.711    | 0.15            | 1           | 1        | 0.23   |
| Glycerolipid metabolism                     | 12    | 1.28     | 1    | 0.74377  | 0.13            | 1           | 1        | 0.18   |
| Vitamin B6 metabolism                       | 12    | 1.28     | 1    | 0.74377  | 0.13            | 1           | 1        | 0.27   |
| Cysteine and methionine metabolism          | 26    | 2.77     | 2    | 0.78586  | 0.10            | 1           | 1        | 0.16   |
| Citrate cycle (TCA cycle)                   | 39    | 4.15     | 3    | 0.80735  | 0.09            | 1           | 1        | 0.39   |
| One carbon pool by folate                   | 15    | 1.60     | 1    | 0.8184   | 0.09            | 1           | 1        | 0.43   |
| Pantothenate and CoA biosynthesis           | 17    | 1.81     | 1    | 0.85577  | 0.07            | 1           | 1        | 0.25   |
| Biotin metabolism                           | 18    | 1.92     | 1    | 0.87149  | 0.06            | 1           | 1        | 0.24   |
| Phosphatidylinositol signaling system       | 20    | 2.13     | 1    | 0.89804  | 0.05            | 1           | 1        | 0.11   |
| Pyruvate metabolism                         | 35    | 3.73     | 2    | 0.90508  | 0.04            | 1           | 1        | 0.24   |
| Thiamine metabolism                         | 21    | 2.24     | 1    | 0.90921  | 0.04            | 1           | 1        | 0.15   |
| Amino sugar and nucleotide sugar metabolism | 49    | 5.22     | 3    | 0.91304  | 0.04            | 1           | 1        | 0.23   |
| Folate biosynthesis                         | 36    | 3.83     | 2    | 0.91362  | 0.04            | 1           | 1        | 0.43   |
| Fructose and mannose metabolism             | 23    | 2.45     | 1    | 0.92804  | 0.03            | 1           | 1        | 0.14   |
| Propanoate metabolism                       | 27    | 2.87     | 1    | 0.9549   | 0.02            | 1           | 1        | 0.27   |
| Valine, leucine and isoleucine degradation  | 33    | 3.51     | 1    | 0.97774  | 0.01            | 1           | 1        | 0.66   |
| Fatty acid biosynthesis                     | 96    | 10.22    | 1    | 0.99999  | 0.00            | 1           | 1        | 0.38   |
