# Supplementary material for: Piperaquine-resistant PfCRT mutations differentially impact drug transport, hemoglobin catabolism and parasite physiology in Plasmodium falciparum asexual blood stages
Source: PubMed Central journal article supplement (PMC9645663; doi:10.1371/journal.ppat.1010926), 2022-10-28

# S8 Figure

## Aminoacyl-tRNA biosynthesis

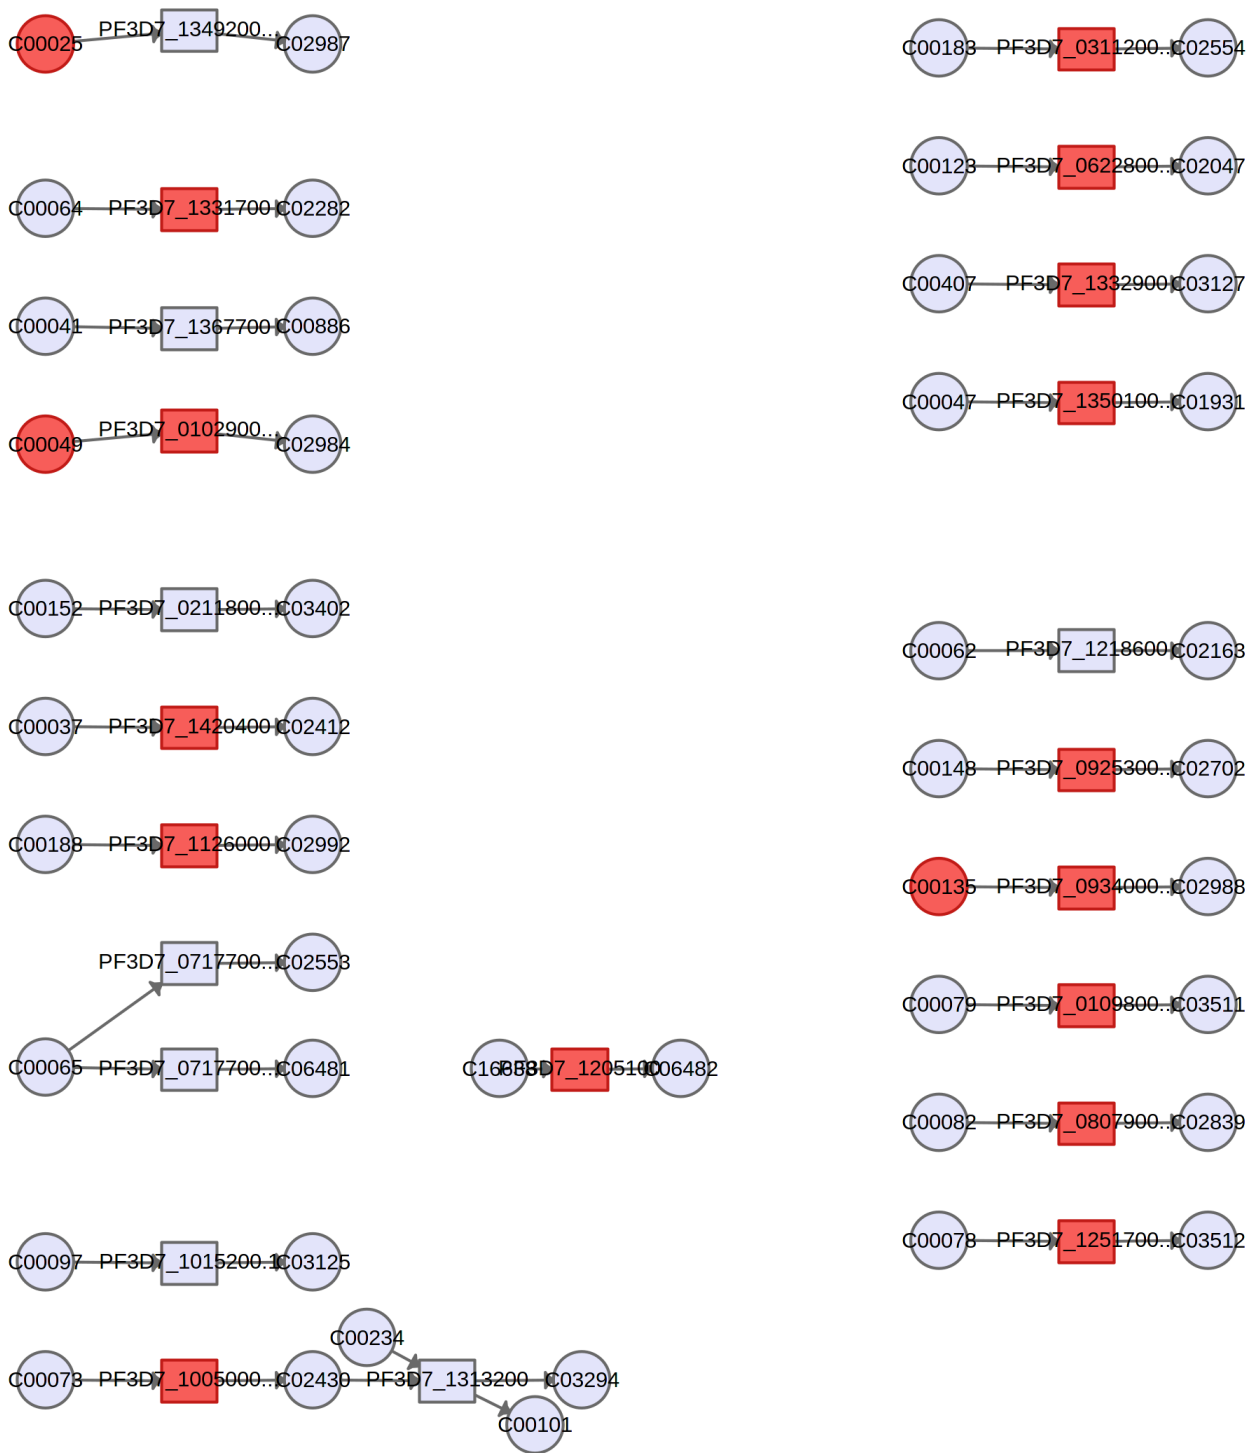

Supplement: ppat.1010926.s008.pdf [file ppat.1010926.s008.pdf]
