# Supplementary material for: Piperaquine-resistant PfCRT mutations differentially impact drug transport, hemoglobin catabolism and parasite physiology in Plasmodium falciparum asexual blood stages
Source: PubMed Central journal article supplement (PMC9645663; doi:10.1371/journal.ppat.1010926), 2022-10-28
Supplement: ppat.1010926.s009.pdf [file ppat.1010926.s009.pdf]

**S1 Table. [<sup>3</sup>H]-drug accumulation and 72 hr susceptibility profiling of *pfcr*-edited lines.**

| Line                    | Piperaquine |                       |                       | Chloroquine   |                       |                       |
|-------------------------|-------------|-----------------------|-----------------------|---------------|-----------------------|-----------------------|
|                         | CAR         | IC <sub>50</sub> (nM) | IC <sub>90</sub> (nM) | CAR           | IC <sub>50</sub> (nM) | IC <sub>90</sub> (nM) |
| Dd2 <sup>Dd2crt</sup>   | 1786 ± 164  | 19.9 ± 2.4            | 34.4 ± 1.2            | 24.7 ± 3.0    | 82.7 ± 5.6            | 144 ± 11.6            |
| Dd2 <sup>F145lcrt</sup> | 1135 ± 67   | 76.8 ± 11.8 *         | 1775 ± 334 *          | 838 ± 24.0 *  | 20.3 ± 0.8 *          | 45.5 ± 2.8 *          |
| Dd2 <sup>M343Lcrt</sup> | 1348 ± 109  | 32.1 ± 1.8 *          | 214 ± 12.0 *          | 662 ± 20.0 *  | 20.8 ± 1.1 *          | 43.0 ± 0.7 *          |
| Dd2 <sup>G353Vcrt</sup> | 1186 ± 140  | 51.5 ± 6.7 *          | 674 ± 66 *            | 540 ± 10.7 *  | 19.8 ± 1.1 *          | 46.8 ± 1.1 *          |
| Dd2 <sup>3D7crt</sup>   | 1980 ± 110  | 9.5 ± 1.1 *           | 18.9 ± 2.0 *          | 1161 ± 123 ** | 9.5 ± 1.1 *           | 11.2 ± 0.2 *          |

Mean ± SEM cellular accumulation ratios (CARs) and IC<sub>50</sub> and IC<sub>90</sub> values were determined from 4 to 5 independent experiments performed in duplicate. Statistical significance was determined using Mann-Whitney *U* tests. *p* values are reported for comparisons with Dd2<sup>Dd2crt</sup>. \**p* < 0.05; \*\**p* < 0.01. The raw data used for this analysis is in **S1 Dataset**.
