# Supplementary material for: Piperaquine-resistant PfCRT mutations differentially impact drug transport, hemoglobin catabolism and parasite physiology in Plasmodium falciparum asexual blood stages
Source: PubMed Central journal article supplement (PMC9645663; doi:10.1371/journal.ppat.1010926), 2022-10-28
Supplement: ppat.1010926.s011.pdf [file ppat.1010926.s011.pdf]

**S3 Table. Averaged log<sub>2</sub> fold change of the baseline peptide levels in the *pfcr*t-edited and field lines versus Dd2<sup>Dd2crt</sup>.**

| Peptide         | Mass Spec mode      | Dd2 <sup>F145ICRT</sup> | Dd2 <sup>G353VCRT</sup> | Dd2 <sup>M343LCRT</sup> | Dd2 <sup>3D7CRT</sup>  | Dd2                    | RF12                   | RF7                    |
|-----------------|---------------------|-------------------------|-------------------------|-------------------------|------------------------|------------------------|------------------------|------------------------|
|                 |                     | /Dd2 <sup>Dd2crt</sup>  | /Dd2 <sup>Dd2crt</sup>  | /Dd2 <sup>Dd2crt</sup>  | /Dd2 <sup>Dd2crt</sup> | /Dd2 <sup>Dd2crt</sup> | /Dd2 <sup>Dd2crt</sup> | /Dd2 <sup>Dd2crt</sup> |
| AAHLP;AHLPA     | AAHLP;AHLPA_pos     | -0.989                  | -2.397                  | 1.124                   | 3.316                  | -1.772                 | 0.519                  | -0.645                 |
| PAVHAS          | PAVHAS_pos          | 0.544                   | -5.296                  | 2.729                   | -0.189                 | -3.797                 | 0.253                  |                        |
| DGLAH           | DGLAH_neg           | 0.335                   | -0.259                  | -1.631                  | 1.699                  | 1.452                  | 0.761                  | 0.208                  |
| LVVYP           | LVVYP_neg           | 1.064                   | -2.927                  |                         | 2.032                  | 1.166                  | -0.351                 | 1.208                  |
| LSFP            | LSFP_pos            | -1.956                  |                         | 1.446                   | -0.509                 | -1.026                 | -0.236                 | 0.904                  |
| HAHKLRV         | HAHKLRV_pos         | -2.537                  | -1.031                  | 1.107                   | -1.539                 | -3.210                 |                        | 0.613                  |
| VNFKL           | VNFKL_pos           | -1.035                  | -0.688                  | -0.187                  | -1.204                 | -2.795                 | 0.329                  | 0.162                  |
| SPADKT          | SPADKT_pos          | 0.431                   | 0.998                   | 0.269                   | -1.503                 | -2.072                 | 0.948                  | 1.298                  |
| VKAA            | VKAA_pos            | 0.516                   | 0.864                   | -0.236                  | -2.457                 | -2.050                 | 0.870                  | 0.509                  |
| LWGKV           | LWGKV_pos           | 1.316                   | 1.090                   | 0.666                   | -4.209                 | -3.307                 | 2.689                  | 1.976                  |
| PKVK            | PKVK_pos            | 0.877                   | -0.181                  | 0.086                   | -1.926                 | -1.499                 | 0.030                  | 1.438                  |
| FKLLSH          | FKLLSH_pos          | 1.502                   | 0.652                   | 1.043                   | -2.998                 | -5.306                 | 0.831                  | -0.435                 |
| TNAVA;NALSA     | TNAVA;NALSA_pos     | 0.707                   | 0.101                   | 0.242                   | -4.121                 | -5.660                 | 0.974                  | 0.114                  |
| PVQAAY          | PVQAAY_pos          | 1.135                   | 0.644                   | 0.930                   |                        | -3.134                 | -0.728                 | -0.153                 |
| VGGEALG         | VGGEALG_pos         | 1.062                   | 0.670                   | 0.395                   | -1.209                 | -1.754                 | -0.186                 | 0.409                  |
| WGKVVN;ALAHKY   | WGKVVN;ALAHKY_pos   | 0.671                   | -0.041                  | 1.989                   | -2.881                 | -4.012                 | -0.712                 | 1.145                  |
| ALSALSD         | ALSALSD_pos         | -1.325                  | -0.082                  | -0.405                  | -3.012                 |                        | -1.821                 | -0.514                 |
| ALGRLLVV        | ALGRLLVV_pos        |                         | -0.257                  | -0.680                  | -3.768                 | 0.132                  | -2.869                 | -0.929                 |
| GE;DA           | GE;DA_pos           | 0.124                   | 0.345                   | -0.684                  | -1.496                 | -0.518                 | -1.280                 | 0.044                  |
| DLS             | DLS_pos             | 0.320                   | 0.528                   | -1.312                  | -2.316                 | -0.590                 | -1.639                 | 0.170                  |
| KFLASV          | KFLASV_pos          | 0.523                   | 0.333                   | 0.693                   | -3.557                 | -1.488                 | -0.216                 | 0.685                  |
| FLAS            | FLAS_pos            | 0.133                   | 0.150                   | -0.824                  | -2.938                 | -0.870                 | 0.079                  | -0.274                 |
| LASVSTV;ASVSTVL | LASVSTV;ASVSTVL_pos | -1.597                  | 1.625                   | 0.185                   | -9.587                 | -1.599                 | -0.212                 | 0.679                  |
| AGVAN;GVANA     | AGVAN;GVANA_pos     | 0.349                   | -0.091                  | -0.037                  | -4.024                 | 0.184                  | -0.034                 | -0.192                 |
| AHKLRV          | AHKLRV_pos          | 0.766                   | -0.169                  | 0.822                   | -5.563                 |                        | -1.076                 | -2.284                 |
| KSAVTAL         | KSAVTAL_pos         | 1.108                   | 0.148                   | 0.342                   | -4.947                 | -3.588                 |                        | -1.028                 |
| NF              | NF_pos              | 0.256                   | 1.308                   | -0.523                  | -2.677                 | -1.065                 | -0.376                 | -1.193                 |
| VLSPADK         | VLSPADK_pos         | -0.091                  |                         | -0.116                  | -2.324                 | -0.966                 | 0.167                  | -0.614                 |
| LT;TL           | LT;TL_neg           | -0.373                  | 2.244                   | -0.135                  | -3.063                 | -0.842                 | -0.233                 | -1.044                 |
| VAGVANAL        | VAGVANAL_pos        | 0.464                   | -0.949                  | 0.848                   | -4.604                 | -0.140                 | -0.430                 | -3.525                 |
| AEA             | AEA_pos             | 0.210                   | -0.132                  | 0.111                   | -0.033                 | -0.936                 | -0.328                 | 0.039                  |
| NAVAHV          | NAVAHV_pos          | 1.284                   | -1.638                  | 0.227                   | -3.487                 | -3.547                 | -2.466                 | -0.235                 |
| HGKKV           | HGKKV_pos           | 0.364                   | -0.476                  | -1.037                  |                        | -3.513                 | -3.959                 | 1.120                  |
| WTQR            | WTQR_pos            | 0.055                   | -1.979                  | -0.508                  | -2.974                 | -3.444                 | -3.700                 | 0.787                  |
| FFE             | FFE_pos             | -0.213                  | -0.475                  | 0.819                   | -1.426                 | -0.374                 | -0.912                 | 0.583                  |
| PVNFKL          | PVNFKL_pos          | -5.026                  |                         | -0.115                  | -3.087                 | -1.867                 | -1.681                 | -2.283                 |
| VKGHG           | VKGHG_pos           | -2.924                  | -2.129                  | -1.397                  | -1.235                 | -0.933                 | -0.258                 |                        |
| LAHL            | LAHL_pos            | -5.422                  | -5.114                  | -0.770                  |                        | -3.520                 | -3.828                 | 0.338                  |
| VKGHGKKV        | VKGHGKKV_pos        | -1.702                  | -0.225                  | -1.791                  |                        | -2.125                 | -1.347                 | -3.383                 |
| DLSHG           | DLSHG_pos           | -0.729                  | -0.780                  | -0.699                  | -0.710                 | -1.192                 | -1.005                 | -0.586                 |
| TAAHLP          | TAAHLP_pos          | -0.604                  | -0.698                  | -0.734                  | -0.581                 | -1.692                 | -1.640                 | -1.223                 |

|                   |                       |        |        |        |        |        |        |        |
|-------------------|-----------------------|--------|--------|--------|--------|--------|--------|--------|
| LSH               | LSH_pos               | -0.821 | -1.876 | -0.895 | -1.719 | -3.164 | -1.229 | -1.104 |
| KVADAL            | KVADAL_pos            | -2.979 | -2.151 | -1.477 | -3.840 | -5.167 |        | -4.747 |
| KVKAH             | KVKAH_pos             | -3.079 | -1.754 | -1.830 | -5.437 | -6.414 | -2.257 | -3.302 |
| LA AHLPA          | LA AHLPA_pos          | -1.247 | -1.688 | -2.272 | -3.776 |        | -2.315 | -3.612 |
| KVGAHA            | KVGAHA_neg            | -1.485 | -3.780 | -2.215 | -6.391 | -4.401 | -4.221 | -5.409 |
| LDKFLA            | LDKFLA_pos            | 0.767  | -0.280 | 0.265  | -2.143 | -1.195 | -2.688 | -1.245 |
| VDPEN             | VDPEN_neg             | -0.078 | 0.560  | 3.425  | -4.395 | -4.490 | -6.003 | -3.232 |
| KAHGK;AHGKK       | KAHGK;AHGKK_pos       | -0.240 | -0.557 | -0.415 | -1.759 | -1.900 | -2.926 | -1.897 |
| QKV VAGV          | QKV VAGV_pos          | -0.623 | 0.490  | -0.226 |        | -1.464 | -2.767 | -1.604 |
| DKTNVK            | DKTNVK_pos            | -1.286 | -0.420 | -0.258 | -3.943 |        | -1.831 | -1.322 |
| HKLRV             | HKLRV_pos             | -0.618 | -1.057 | -0.370 | -5.586 | -6.538 | -2.355 | -1.547 |
| AHKLR             | AHKLR_pos             | -1.782 | -1.578 | -0.730 | -3.312 | -3.532 | -3.438 | -0.359 |
| KGHGKVA           | KGHGKVA_pos           | -4.194 | -0.428 | 0.578  | -4.460 | -3.659 | -4.110 | -3.320 |
| GKVG AH;QVKGH     | GKVG AH;QVKGH_neg     | -2.912 | -0.805 | 0.366  | -4.091 | -4.659 | -3.943 | -3.127 |
| VAGVANAL          | VAGVANAL_neg          | -5.154 | -3.517 | -0.556 | -7.518 | -5.940 | -7.444 | -5.656 |
| KAHGKK            | KAHGKK_neg            | -1.658 | -1.199 | 1.454  | -5.069 | -4.126 |        | -2.438 |
| HKLRV             | HKLRV_neg             | -1.709 | -1.462 | 0.680  | -5.961 | -3.696 |        | -3.397 |
| KGHGKK            | KGHGKK_neg            | -1.699 | -0.874 | 0.355  | -4.991 | -3.592 | -5.277 | -2.215 |
| AHKLR             | AHKLR_neg             | -2.783 | -0.615 | 0.855  | -3.661 | -3.448 | -5.601 | -2.697 |
| KLLS              | KLLS_pos              | -0.569 | -1.224 | -1.360 | -3.091 | -1.834 | -0.124 | -1.019 |
| KVLG;KVVA         | KVLG;KVVA_pos         | -1.831 | -1.107 | -1.490 | -2.235 | -1.104 | 0.010  | -0.699 |
| TPPV              | TPPV_pos              | -5.635 | -3.147 | -9.619 | -8.666 | -0.563 | -3.145 | -0.069 |
| HKLRVD            | HKLRVD_pos            | -0.962 | -5.119 | -2.426 | -2.177 | -1.646 | -0.935 | -4.423 |
| AYQKV VAG         | AYQKV VAG_pos         | -1.053 | -2.592 | -1.496 | -1.226 | -0.375 | -1.643 | -0.027 |
| ALWG              | ALWG_pos              | 0.071  | -1.261 | -0.390 | -0.869 | -0.791 | -0.793 | -0.531 |
| GNPK              | GNPK_pos              | 0.909  | -1.541 | -0.606 | -1.383 | -0.663 | -0.770 | -0.303 |
| GNPKVK            | GNPKVK_pos            | -0.678 | -1.763 | -1.530 | -2.781 | -1.635 | -1.373 | -0.635 |
| VAGVAN            | VAGVAN_neg            | -0.651 | -2.057 | -2.309 | -3.241 | -1.461 | -3.311 | -1.274 |
| NLK;QKV           | NLK;QKV_pos           | 0.539  | -1.122 | -0.881 | -1.394 | 0.200  | -0.274 | 0.253  |
| KA                | KA_pos                | -0.712 | -2.612 | -0.406 | -1.767 |        | -0.318 | 1.466  |
| HCDK              | HCDK_pos              | 0.002  | -2.791 | -0.545 | -1.318 | -0.952 | 1.650  |        |
| KLRVDPV           | KLRVDPV_pos           | 0.387  | -0.393 | -1.746 |        | -0.650 | -0.514 | -1.307 |
| GAFS;AYQ          | GAFS;AYQ_pos          | 0.978  | -0.029 | -1.112 | 2.014  | -1.060 | -0.922 | -0.867 |
| VLSP              | VLSP_pos              | 0.705  | 0.892  | -0.790 | 0.725  | 0.680  | -0.555 | 0.747  |
| TVLT              | TVLT_pos              | 0.293  | 1.247  | -1.324 | -0.276 | 0.444  | -0.945 | -0.625 |
| SFGDL;FGDLS;FSDGL | SFGDL;FGDLS;FSDGL_pos | -0.079 | 0.912  | -1.057 | 0.221  | 0.534  | -0.844 | -0.073 |
| SFG               | SFG_pos               | 0.322  | 0.823  | -1.091 | -0.361 | -0.017 | -1.246 | 0.077  |
| HHFG              | HHFG_pos              | 0.772  | 0.797  | -1.229 | -0.069 | 0.000  | -0.938 | 0.535  |
| SPA               | SPA_pos               | 0.312  | -0.278 | 0.137  | -0.101 | -0.514 | -1.968 | 0.196  |
| TKTY              | TKTY_pos              | -0.158 | 0.983  | -0.962 | -0.663 | 0.263  | -2.344 | -0.244 |
| SVS               | SVS_pos               | 0.929  | 1.159  | -0.210 | -0.357 | 0.205  | -2.019 | -0.018 |
| HVDD              | HVDD_pos              | 0.678  | 0.674  | -0.622 | -0.584 | -0.014 | -1.468 | -0.451 |
| PVQA              | PVQA_pos              | 0.837  | 0.922  | -0.618 | -1.337 | -0.966 | -1.968 | -0.095 |
| VNVD              | VNVD_pos              | 0.752  | 0.626  | -0.618 | -0.850 | -0.629 | -2.134 | -0.249 |
| LRVD              | LRVD_neg              | 1.094  | 1.200  | -1.352 | -0.651 | -1.606 | -4.196 | -1.120 |

|                      |                       |        |        |        |        |        |        |        |
|----------------------|-----------------------|--------|--------|--------|--------|--------|--------|--------|
| SFPTTK;ASLDKF;DKFLAS | SFPTTK;ASLDKF;DKFLAS  | -0.183 | 0.762  | -1.971 | -0.956 | -1.578 | -2.313 | -1.016 |
| EL                   | EL_pos                | -0.010 | -0.063 | -1.113 | -0.019 | -0.611 | -1.035 | -0.512 |
| SAQV;TNAV;NALS       | SAQV;TNAV;NALS_pos    | -0.353 | 0.174  | -1.589 | -0.551 | 0.236  | -0.911 | 0.167  |
| AL;LA                | AL;LA_pos             | -0.724 | 0.121  | -2.561 | -1.996 | -0.424 | -2.055 | -1.006 |
| GEALGRLL             | GEALGRLL_pos          | -1.147 | 0.177  | -3.132 |        | -0.041 | -1.969 | -1.779 |
| YR                   | YR_pos                | -0.869 | -0.555 | -2.442 | -0.471 | -0.085 | -1.429 | -0.792 |
| VAGVAN               | VAGVAN_pos            | -0.272 | -0.914 | -1.991 | -0.306 | -0.326 | -1.289 | -0.505 |
| VHASL                | VHASL_pos             | 0.503  | -0.719 | -0.600 | -1.449 | 0.179  | -1.899 | -0.542 |
| DEVGG                | DEVGG_neg             | 2.129  | -0.059 | -3.134 | -3.660 | -0.979 | -8.203 | -2.941 |
| SFGDLS               | SFGDLS_pos            | 0.426  | -0.711 | -0.923 | -0.171 | -0.089 | -1.348 | -0.550 |
| VHASL                | VHASL_neg             | 0.325  | -1.144 | -1.336 | -0.164 | 0.184  | -2.095 | -0.818 |
| DPE                  | DPE_neg               | 1.721  | -1.000 | -1.378 | -0.283 | -0.565 | -3.176 | -2.465 |
| EE                   | EE_neg                | 0.713  | -0.109 | -1.346 | 0.182  | -0.138 | -1.528 | -1.435 |
| PTTK                 | PTTK_pos              | -2.115 | 0.880  | -1.659 | 0.014  | 1.389  | -1.459 |        |
| KVKA                 | KVKA_pos              | -3.793 |        | -1.294 | -0.667 | 0.476  | -3.749 | -1.044 |
| VNV                  | VNV_pos               | -1.880 | -0.309 | -0.398 | -1.506 | 1.003  | -2.258 |        |
| KVNV                 | KVNV_pos              | -3.992 | -0.159 | -2.534 |        | -0.970 | -0.758 | 0.621  |
| DKL                  | DKL_neg               | -2.522 | 0.401  | -2.475 | -0.537 | 0.730  | -0.167 | -0.146 |
| RLLVVYP              | RLLVVYP_pos           | -2.072 | 1.356  | -3.581 | -0.372 | -0.841 |        | 1.784  |
| ALSALSD              | ALSALSD_neg           | -0.346 | 0.366  | -0.544 | 0.299  | -0.202 | -0.096 | 0.045  |
| GKKVADA              | GKKVADA_pos           | 0.645  | -0.438 | 0.380  | -0.964 |        | 1.012  | 0.734  |
| VKA;LKG              | VKA;LKG_pos           | 0.753  | -0.425 | 0.680  | -0.300 | 1.191  |        | 0.574  |
| LTP                  | LTP_pos               | 1.320  | 0.280  | 2.560  | -0.715 | 0.415  | 1.871  | 6.757  |
| MPNA                 | MPNA_pos              | 1.894  | 0.328  | 0.653  | 0.907  | -1.090 | -0.543 | 0.110  |
| TSKY                 | TSKY_pos              | 0.719  | 0.429  | 1.396  | 0.815  | -1.242 | -0.579 | 0.030  |
| HCLLV                | HCLLV_pos             | 2.447  | 3.380  | 1.891  | 1.147  |        | 2.686  | 3.806  |
| AVTALW               | AVTALW_pos            | 1.365  | 1.499  | 0.628  | 0.140  | -3.394 | 1.812  | 2.018  |
| TYF                  | TYF_pos               | 3.724  | 3.152  | 2.110  | 0.162  | -2.691 | 0.991  | 2.791  |
| PPV                  | PPV_pos               | 1.987  | 1.783  | 1.950  | -0.235 | -1.252 | 0.035  | 0.514  |
| TVLTSK               | TVLTSK_pos            | 1.584  | 1.400  | 0.824  | 1.173  | -0.398 | 0.201  | 2.283  |
| VDEV                 | VDEV_pos              |        | 2.590  | 1.129  | 2.627  | 0.499  | 1.482  | 2.942  |
| CLL                  | CLL_pos               | 1.633  | 2.828  | 1.404  | 1.958  | 2.285  | 0.715  | 0.319  |
| YFPH                 | YFPH_pos              |        | 6.450  | 4.510  | 5.055  | 7.716  | 2.398  | 1.665  |
| RMF                  | RMF_pos               | -0.340 | 7.682  | 3.715  | 4.545  | 6.447  | 3.519  |        |
| HFDLSHGSAQ           | HFDLSHGSAQ_pos        | 3.388  | 5.279  | 3.681  | 2.178  | 2.043  | -0.608 | 1.971  |
| FG                   | FG_pos                | 1.657  | 3.912  | 1.463  | 1.818  | 1.573  | 0.402  | 1.471  |
| HVDPENF              | HVDPENF_pos           | 1.925  | 3.084  | 1.182  | 0.694  | 2.188  | 0.068  | 1.238  |
| EVGG;VGGE;LDN;DNL    | EVGG;VGGE;LDN;DNL_pos | 1.829  | 1.876  | 0.620  | 1.334  | 0.962  | -0.094 | 1.425  |
| LSALSDLH             | LSALSDLH_pos          | 4.109  | 5.411  | 4.208  | 4.170  | 5.146  | -0.292 | 3.416  |
| NPK                  | NPK_pos               | 1.808  | 2.448  | 2.769  | 3.325  | 2.194  |        | 1.278  |
| VC;CV                | VC;CV_neg             | 1.181  | 1.583  |        | 1.510  | 1.026  | -0.257 | 0.519  |
| AHA;AAH              | AHA;AAH_pos           | 4.603  | 5.463  | 5.296  | 3.625  | 3.961  | 4.736  | 4.843  |
| EALGRL               | EALGRL_pos            | 1.814  | 2.784  | 2.374  | 1.003  |        | 2.418  | 2.471  |
| FLSFP                | FLSFP_pos             | 5.914  | 4.849  | 4.437  | 2.213  |        | 3.356  | 3.522  |
| LASVS                | LASVS_pos             | 5.406  | 3.955  | 5.280  | 3.665  | 5.731  | 4.393  |        |

|                     |                      |        |        |        |        |        |        |        |
|---------------------|----------------------|--------|--------|--------|--------|--------|--------|--------|
| NPKVK               | NPKVK_pos            | 8.214  | 6.992  | 8.377  | 4.952  | 6.335  | 3.588  | 7.674  |
| DKTNV               | DKTNV_pos            | 5.008  | 4.268  | 3.963  | 4.273  | 3.270  | 2.768  | 3.245  |
| VVY                 | VVY_pos              |        | 5.677  | 4.347  | 5.830  | 5.109  | 5.008  | 4.846  |
| AA                  | AA_pos               |        | 1.941  | 2.494  | 1.066  | 3.535  | 3.125  | 2.206  |
| HGKKV               | HGKKV_neg            | 4.964  | 6.474  | 7.184  | 4.334  | 2.076  | 5.941  | 1.339  |
| VCVLAH              | VCVLAH_pos           | 7.025  | 6.101  | 8.341  | 3.352  | 1.790  | 4.403  |        |
| FPHFD               | FPHFD_neg            | 5.080  | 3.851  | 4.919  | 1.529  | 1.418  | 2.383  | 0.718  |
| VVAGVANA            | VVAGVANA_pos         | 2.652  | 1.493  | 2.551  | 0.059  | 0.748  | 2.898  | 1.635  |
| NVDEVGGEALG         | NVDEVGGEALG_pos      | 2.033  | 3.067  | 1.147  | 0.214  | 0.173  | 1.838  | 1.008  |
| SPADK               | SPADK_pos            | 1.768  | -0.209 | 1.086  | 0.346  | -0.192 | -1.134 | 0.589  |
| TFATLS              | TFATLS_pos           | 2.300  | -0.660 | 2.423  | 1.729  | 1.205  | -0.444 | 0.110  |
| SP                  | SP_pos               | 3.825  | 3.148  | 0.987  | 0.682  | -1.534 | -2.132 | 2.813  |
| KTNV;TNVK           | KTNV;TNVK_pos        | 2.320  | 2.426  | 0.565  | 1.195  | -0.019 | -0.806 | 0.899  |
| EVG;GDL;STP;DAV;DGL | EVG;GDL;STP;DAV;DGL_ | 4.111  | 3.502  | 2.330  | 1.216  | 0.785  | -1.578 | 2.598  |
| WTQ                 | WTQ_pos              | 3.159  | 1.783  | 0.108  | 0.794  | 0.522  | -0.247 | 0.254  |
| FPTT                | FPTT_pos             | 2.532  | 0.892  | 1.451  | 1.668  | 0.586  | -0.393 | 1.545  |
| FTP                 | FTP_pos              | 3.239  | 1.760  | 1.752  | 1.278  | 0.959  | -0.497 | 1.328  |
| DPVNF               | DPVNF_pos            | 3.247  | 1.699  | 2.381  | 1.675  | 1.051  | 0.181  | 1.970  |
| DPEN                | DPEN_pos             | 2.810  | 1.205  | 2.240  | 1.451  | 0.418  | 0.171  | 1.581  |
| TPDAVMG             | TPDAVMG_pos          | 3.163  | 1.084  | 2.208  | 1.281  | 1.130  | 0.513  | 1.402  |
| DPENF               | DPENF_pos            | 2.653  | 0.817  | 1.758  | 0.842  | 0.217  | -0.914 | 0.954  |
| TPPVQ               | TPPVQ_pos            | 2.436  | 0.981  | 1.953  | 0.950  | 0.437  | -0.759 | 0.485  |
| YPWT                | YPWT_pos             | 2.243  | 0.315  | 1.729  | 1.080  | 0.120  | -0.949 | 0.751  |
| LWGK                | LWGK_pos             | 2.728  | 1.353  | 0.999  | 0.887  | 1.218  | -1.822 | 0.600  |
| TPDAVM              | TPDAVM_pos           | 2.065  | 0.528  | 0.954  | 0.709  | 0.807  | -1.433 | 0.802  |
| YP                  | YP_pos               | 1.374  | 0.791  | 0.049  | 1.094  | 0.831  | -0.739 | 0.839  |
| KGHGK;GHGKK         | KGHGK;GHGKK_neg      | 0.844  | 0.240  | 1.651  | 0.928  | 1.568  | -2.163 | 2.834  |
| KTYFP               | KTYFP_pos            | 0.715  | 0.837  | 0.153  | 1.274  | -0.303 | -1.128 | -0.832 |
| DGLAHL;GLAHL        | DGLAHL;GLAHL_pos     | 0.444  | 0.503  | -0.708 | 1.216  | 0.269  |        | -0.537 |
| VKGH                | VKGH_pos             | 1.758  | 4.253  | 0.546  | 2.526  | 3.831  | -3.117 |        |
| DKL                 | DKL_pos              | 0.371  | 1.225  | 0.093  | 1.109  | 1.106  | -0.918 | -0.474 |
| FF                  | FF_pos               | 2.298  | 4.102  | -0.129 | 4.799  | 2.826  |        | 0.048  |
| KLRVDP              | KLRVDP_pos           |        | 2.293  | -1.176 | 2.829  | 3.059  | -1.937 | -2.725 |
| VLGAFSDG            | VLGAFSDG_pos         | 0.434  | 0.930  | -0.641 | 0.770  | 1.087  | -0.731 | -0.429 |
| DE                  | DE_neg               | -0.153 | 0.433  | -1.028 | 0.701  | 0.485  | -1.593 | -1.306 |
| ADALT               | ADALT_pos            | 0.631  | 1.154  | -0.190 | 0.376  | 0.060  | -0.203 | -0.392 |
| HAGEYG              | HAGEYG_pos           | 2.422  | 3.608  | -0.954 | 0.746  | 2.213  | 0.228  | -1.316 |
| HF                  | HF_pos               | 2.143  | 4.176  | 2.377  | 1.359  | 1.594  | -0.144 | -1.150 |
| HVDPENF             | HVDPENF_neg          | 4.007  | 6.043  | 4.082  | 2.889  | 2.696  | 1.682  | -2.746 |
| NVDEVGGEALG         | NVDEVGGEALG_neg      | 2.858  | 2.662  | 1.696  | 0.820  | 0.571  | 0.531  | -2.927 |
| ESFGDL              | ESFGDL_pos           | 0.432  | 0.652  | 0.173  | 0.631  | 0.091  | -0.088 | -0.386 |
| VDEVG               | VDEVG_neg            | 7.315  | 6.623  | 2.854  | 4.136  | -0.768 | -1.533 | -2.801 |
| DGLAH               | DGLAH_pos            | 0.054  | 0.142  | 0.560  | 1.711  | 1.480  | 0.242  | -1.069 |
| PAVH                | PAVH_pos             | 3.274  | 1.836  | 0.813  | -0.650 | 3.878  |        | 2.054  |
| NVKAA;AQVKG         | NVKAA;AQVKG_pos      | 1.895  | 1.564  | 1.108  | -0.975 | 1.514  |        | 0.521  |

|                  |                     |       |       |        |        |        |        |        |
|------------------|---------------------|-------|-------|--------|--------|--------|--------|--------|
| KEFT             | KEFT_pos            | 1.699 | 1.521 | 1.145  | -0.926 | 1.594  |        | 0.747  |
| SFGD;FSDG        | SFGD;FSDG_pos       | 1.194 | 1.643 | 0.705  | -1.017 | 0.609  | -0.778 | 0.883  |
| GLAH             | GLAH_pos            | 0.700 | 0.994 | 0.052  | -0.542 | 1.146  | -0.155 | -0.116 |
| SFPTT            | SFPTT_pos           | 0.807 | 1.263 | 0.035  | 0.061  | 0.792  | -0.422 | 0.466  |
| HFG              | HFG_pos             | 1.514 | 3.563 | 0.040  | -0.037 | 0.598  | -0.845 | 0.847  |
| TF;FT            | TF;FT_pos           | 0.861 | 2.694 | -0.281 | -1.337 | 0.288  | -0.555 | 0.330  |
| LT;TL            | LT;TL_pos           | 1.992 | 2.754 | 0.120  | -1.350 | 0.971  | -0.023 | 0.654  |
| VAH;AHV;AVH;VHA  | VAH;AHV;AVH;VHA_pos | 1.521 | 2.853 | 1.669  | -0.356 | -0.303 | -0.513 | 3.067  |
| HFD              | HFD_pos             | 3.560 | 3.242 | 1.183  | -1.653 | -0.359 | -3.213 | 2.500  |
| HLDN             | HLDN_pos            | 1.722 | 2.083 | 0.390  | -0.999 | -0.607 | -1.191 | 1.164  |
| LASVST           | LASVST_pos          | 3.492 | 4.461 | 3.985  | -0.756 | -3.125 | -3.103 | 2.858  |
| GGEALG           | GGEALG_pos          | 1.891 | 2.381 | 1.429  | -0.871 | -0.932 | -1.881 | 1.454  |
| DEVGGEA          | DEVGGEA_pos         | 1.264 | 1.913 | 1.041  | -1.310 | -1.175 | -0.880 | 1.625  |
| EEK              | EEK_pos             | 0.871 | 1.034 | -0.303 | -0.543 | 0.030  | 0.421  | 1.262  |
| PAEF             | PAEF_pos            | 2.066 | 1.774 | -0.175 | -0.893 | -0.277 | 0.245  | 1.268  |
| PNA              | PNA_pos             | 2.375 | 1.679 | 0.835  | -1.503 | -0.489 | 0.304  | 0.811  |
| NP               | NP_pos              | 3.504 | 2.525 | 1.131  | -1.623 | -0.147 | 0.203  | 1.791  |
| PADK             | PADK_pos            | 2.356 | 2.095 | 0.514  | -1.062 | -0.100 | -0.073 | 0.620  |
| PW               | PW_pos              | 2.959 | 2.316 | 0.112  | -0.942 | 0.127  | -0.624 | 1.070  |
| PVN              | PVN_pos             | 4.092 | 3.085 | 0.913  | -2.422 | -0.926 | -1.032 | 3.563  |
| TPA              | TPA_pos             | 2.679 | 2.889 | 0.605  | -1.641 | -0.895 | -0.925 | 2.786  |
| PEEK             | PEEK_pos            | 1.965 | 1.606 | 0.932  | -1.487 | -0.321 | -1.167 | 2.024  |
| PA               | PA_pos              | 2.454 | 1.817 | 0.705  | -2.019 | -0.264 | -0.260 | 2.437  |
| SV;VS            | SV;VS_pos           | 2.641 | 2.288 | 0.459  | -1.536 | 0.101  | -0.057 | 2.638  |
| HG               | HG_pos              | 2.441 | 1.823 | 0.033  | -1.414 | -0.095 | -0.664 | 2.124  |
| PDAV             | PDAV_pos            | 1.574 | 1.626 | -0.141 | -1.111 | -0.055 | -0.549 | 1.632  |
| PVQ              | PVQ_pos             | 3.124 | 2.457 | 0.376  | -1.436 | -0.049 | -0.443 | 2.133  |
| VNVDE;NVDEV      | VNVDE;NVDEV_pos     | 1.972 | 1.966 | 0.124  | -1.186 | 0.267  | -0.477 | 1.461  |
| MP               | MP_pos              | 3.258 | 2.814 | 1.214  | -1.277 | -0.274 | -0.815 | 2.567  |
| TPE              | TPE_pos             | 3.476 | 3.710 | 1.336  | -1.400 | -1.057 | -0.813 | 2.377  |
| DEVGGEALG        | DEVGGEALG_pos       | 2.847 | 2.847 | 1.499  | -0.496 | -0.149 | -0.721 | 1.967  |
| AHVD             | AHVD_pos            | 3.809 | 4.164 | 1.430  | 0.757  | 0.988  | 1.248  | 2.281  |
| ESFGDLS          | ESFGDLS_pos         | 1.443 | 1.483 | 0.387  | 0.100  | 0.383  | 0.419  | 0.652  |
| GAHAGE           | GAHAGE_pos          | 1.396 | 1.732 | 0.754  | 0.152  | 0.163  | -0.117 | 1.209  |
| VDP              | VDP_pos             | 1.882 | 2.276 | 0.711  | -0.478 | 0.720  | 0.084  | 1.233  |
| VG;GV            | VG;GV_pos           | 4.075 | 4.046 | 1.498  | -0.816 | 0.213  | 0.381  | 2.035  |
| TQ               | TQ_pos              | 2.657 | 2.934 | 0.887  | -0.833 | 0.046  | 0.191  | 1.485  |
| TP               | TP_pos              | 3.041 | 2.149 | 0.528  | -0.191 | -0.184 | 0.008  | 1.688  |
| PDAVM            | PDAVM_pos           | 3.006 | 2.325 | 0.484  | -0.181 | 0.084  | 0.288  | 0.742  |
| EAL              | EAL_pos             | 1.495 | 2.010 | 0.091  | 0.060  | 0.321  | -0.758 | 1.283  |
| CVLAH            | CVLAH_pos           | 2.092 | 1.789 | 0.360  | -0.423 | 0.611  | -0.220 | 1.597  |
| HK               | HK_pos              | 2.809 | 2.915 | 0.376  | -0.465 | 0.282  | -0.863 | 1.909  |
| VNVDEVG;EVGGEALG | VNVDEVG;EVGGEALG_p  | 1.891 | 1.327 | 0.252  | -0.048 | 0.238  | -0.442 | 1.101  |
| NL;VQ            | NL;VQ_pos           | 4.490 | 3.922 | 2.237  | -0.684 | 0.748  | 1.539  | 5.279  |
| AHLD             | AHLD_pos            | 2.779 | 2.426 | 1.081  | 0.817  | 1.351  | -0.011 | 2.387  |

|             |                 |       |       |        |         |        |        |        |
|-------------|-----------------|-------|-------|--------|---------|--------|--------|--------|
| PK          | PK_pos          | 4.670 | 3.342 | 2.245  | 1.342   | 1.251  | 0.912  | 4.443  |
| PWT         | PWT_pos         | 4.176 | 3.222 | 1.181  | 0.260   | 1.048  | 0.533  | 3.687  |
| LP          | LP_pos          | 0.465 | 0.712 | -0.468 | -1.440  | -0.814 | -0.258 | 0.328  |
| LST;TLS     | LST;TLS_pos     | 0.738 | 1.331 | -0.875 | -2.065  | -0.956 | -0.881 | 1.113  |
| GAFSD;AFSDG | GAFSD;AFSDG_pos | 1.218 | 0.880 | -0.428 | -2.746  | -2.698 | -1.215 | 0.645  |
| DKF         | DKF_pos         | 1.893 | 1.913 | 0.461  | -1.629  | -0.470 | -0.532 | 0.607  |
| PHFD        | PHFD_pos        | 2.451 | 2.675 | 0.532  | -2.370  | -1.235 | -1.172 | 1.141  |
| VD          | VD_pos          | 1.436 | 1.190 | 0.173  | -1.434  | -0.488 | -0.676 | 0.926  |
| VDEVGGEALG  | VDEVGGEALG_pos  | 1.724 | 1.512 | 0.729  | -1.971  | -0.709 | -0.849 | 0.934  |
| PV          | PV_pos          | 2.841 | 2.369 | 0.580  | -2.045  | -0.229 | -1.294 | 0.795  |
| PEN         | PEN_pos         | 2.307 | 2.574 | 0.857  | -2.487  | -0.487 | -1.329 | 0.230  |
| DNLK        | DNLK_pos        | 1.748 | 1.586 | 0.056  | -1.460  | -0.506 | -1.609 | -0.057 |
| FD          | FD_pos          | 1.914 | 1.675 | 0.443  | -1.783  | -0.616 | -1.802 | 0.683  |
| TPD         | TPD_pos         | 1.445 | 1.142 | 0.007  | -1.697  | -0.362 | -1.234 | 0.521  |
| PWTQ        | PWTQ_pos        | 1.999 | 1.272 | -0.469 | -1.614  | -0.490 | -1.123 | 0.587  |
| PEE         | PEE_pos         | 1.818 | 0.705 | 0.027  | -1.803  | -0.388 | -0.798 | 0.614  |
| NVD         | NVD_pos         | 1.350 | 1.185 | 0.360  | -2.260  | 0.452  | -0.548 | 0.936  |
| PAE         | PAE_pos         | 1.650 | 1.154 | -0.289 | -2.063  | 0.121  | -0.961 | 0.776  |
| VT;LS       | VT;LS_pos       | 2.054 | 1.173 | -0.374 | -1.536  | 0.260  | -0.760 | 0.411  |
| VV          | VV_pos          | 1.930 | 1.715 | -0.592 | -2.112  | 0.419  | -0.398 | 0.467  |
| PTT;DAL     | PTT;DAL_pos     | 1.917 | 1.652 | -0.148 | -2.170  | -0.226 | -0.156 | 1.859  |
| AV;LG;GL;VA | AV;LG;GL;VA_pos | 1.927 | 1.903 | -0.461 | -1.804  | 0.326  | -0.391 | 1.573  |
| VM          | VM_pos          | 1.391 | 1.701 | -0.782 | -2.242  | 0.124  | -0.297 | 1.172  |
| LV;VL       | LV;VL_pos       | 0.706 | 1.484 | -1.006 | -2.005  | 0.236  | -0.781 | 0.462  |
| EV;DL;LD    | EV;DL;LD_pos    | 1.070 | 1.095 | -0.412 | -2.017  | -0.167 | -1.361 | -0.491 |
| NVDE        | NVDE_pos        | 0.681 | 1.283 | -0.254 | -1.922  | -0.125 | -1.544 | -0.090 |
| VNF         | VNF_pos         | 1.991 | 2.064 | -0.113 | -2.635  | -0.364 | -0.435 | 0.482  |
| PDA         | PDA_pos         | 1.396 | 1.190 | -0.073 | -2.718  | -0.343 | -0.978 | -0.072 |
| VLG;VVA     | VLG;VVA_pos     | 1.763 | 1.730 | -0.100 | -2.639  | -0.372 | -0.589 | -0.509 |
| EA          | EA_pos          | 1.260 | 1.368 | -0.221 | -3.870  | -1.073 | -1.544 | 0.056  |
| PE          | PE_pos          | 0.877 | 0.772 | 0.006  | -2.905  | -0.387 | -0.885 | 0.276  |
| VDE;DEV     | VDE;DEV_pos     | 1.137 | 1.245 | -0.092 | -3.405  | -0.702 | -1.056 | 0.756  |
| RLLV        | RLLV_pos        | 2.496 | 1.079 | -0.014 | -11.130 | -2.993 | -3.903 | -0.270 |
| HLD         | HLD_pos         | 1.402 | 0.134 | -0.315 | -1.999  | -0.677 | -1.428 | 1.491  |
| GDLS;SDGL   | GDLS;SDGL_pos   | 1.253 | 0.513 | -0.148 | -1.787  | -0.459 | -2.366 | 0.515  |
| STPDAVM     | STPDAVM_pos     | 1.057 | 0.742 | -0.020 | -1.188  | -0.832 | -2.068 | 1.210  |
| VGGEA       | VGGEA_pos       | 0.776 | 0.213 | 0.501  | -1.157  | -1.402 | -2.057 | 1.563  |
| PVNF        | PVNF_pos        | 1.396 | 1.374 | -0.401 | -0.737  | 0.295  | -1.352 | 0.509  |
| DALT        | DALT_pos        | 0.913 | 1.392 | -0.872 | -0.659  | -0.086 | -0.785 | 0.212  |
| DGLA        | DGLA_pos        | 1.312 | 1.786 | -0.898 | -0.826  | -0.426 | -0.800 | 0.331  |
| PAV         | PAV_pos         | 2.090 | 1.806 | -0.409 | -0.565  | -0.408 | -0.616 | 0.812  |
| PENF        | PENF_pos        | 1.855 | 1.521 | 0.022  | -0.530  | -0.558 | -0.294 | 0.950  |
| DEVG;STPD   | DEVG;STPD_pos   | 1.742 | 1.492 | -0.489 | -0.781  | -0.585 | -0.791 | 0.378  |
| NVDEVG      | NVDEVG_pos      | 1.066 | 1.494 | -0.638 | -0.011  | -0.051 | -0.429 | 0.876  |
| YH          | YH_pos          | 1.223 | 2.570 | -0.349 | -0.401  | -0.565 | -1.095 | 0.875  |

|                   |                     |        |        |        |        |        |        |        |
|-------------------|---------------------|--------|--------|--------|--------|--------|--------|--------|
| ESFG;AFSD         | ESFG;AFSD_pos       | 0.732  | 0.702  | -0.303 | -0.232 | -0.659 | -1.040 | 0.472  |
| VNVDEVGGEALG      | VNVDEVGGEALG_pos    | 2.340  | 2.441  | -0.776 | -0.934 | -1.018 | -3.165 | 1.976  |
| VLSPAD            | VLSPAD_pos          | 0.608  | 1.172  | -0.392 | -0.033 | -0.825 | -0.413 | -0.480 |
| TFATL             | TFATL_pos           | 1.289  | 1.270  | -0.859 | 0.283  | -0.987 | -0.877 | 0.148  |
| DGLA              | DGLA_neg            | 3.058  | 3.594  | -0.082 | -0.716 | -1.507 | 0.115  | -0.471 |
| FPH;PHF           | FPH;PHF_pos         | 1.999  | 4.036  |        | -1.032 | 2.445  | -0.143 | -2.279 |
| TY                | TY_pos              | 0.384  | 2.685  | 0.315  | -0.234 | 1.123  | -0.263 | -2.205 |
| FPH;PHF           | FPH;PHF_neg         | 0.360  | 3.517  | 0.497  | -1.227 | 1.160  | -1.512 | -2.052 |
| TF;FT             | TF;FT_neg           | -0.506 | 3.363  | -0.480 | -2.037 | 0.183  | -1.227 | -0.520 |
| PAE               | PAE_neg             | 0.702  | 2.785  | 1.145  | -2.470 | 0.556  | -2.170 | -1.287 |
| TYFP              | TYFP_neg            | 0.315  | 0.925  | -1.003 | -1.328 | 0.800  | -0.683 | -0.567 |
| LSP               | LSP_pos             | 1.345  | 3.872  | 0.378  | -1.499 | -0.447 | 0.103  | -1.201 |
| GKKV              | GKKV_pos            | 0.998  |        | 0.054  | -1.410 | -0.762 | -0.081 | -0.966 |
| EVGGEA            | EVGGEA_pos          | 2.336  | 2.096  | 0.916  | 0.149  | -0.125 | -0.143 | -0.719 |
| MGNPK             | MGNPK_pos           | 2.109  | 2.241  | 1.119  | -0.020 | 0.136  | -0.208 | 0.325  |
| PENF              | PENF_neg            | 4.744  | 4.381  | 1.925  | -0.898 | -0.132 | -0.171 | -0.146 |
| PW                | PW_neg              | 4.975  | 4.771  | 0.936  | -0.644 | 1.787  | -0.826 | 0.250  |
| PWT               | PWT_neg             | 5.601  | 4.978  | 0.938  | -0.747 | 1.282  | 0.777  | 0.063  |
| PDAVM             | PDAVM_neg           | 3.356  | 4.191  | 0.856  | -0.583 | 0.635  | 0.641  | -1.353 |
| PV                | PV_neg              | 3.693  | 3.723  | 1.550  | -2.061 | 2.323  | -1.249 | -1.892 |
| TP                | TP_neg              | 3.245  | 2.758  | 0.686  | -0.412 | 1.013  | -0.778 | -1.680 |
| VNVDEVGGEA        | VNVDEVGGEA_neg      | 2.009  | 3.188  | 2.021  | -0.561 | 0.327  | -0.369 | -1.509 |
| PEEK              | PEEK_neg            | 1.996  | 2.373  | 0.136  | -1.535 | 0.560  | -0.510 | -1.900 |
| NP                | NP_neg              | 3.183  | 2.695  | 0.944  | -1.805 | 0.431  | -0.047 | -1.449 |
| VT;LS             | VT;LS_neg           | 3.320  | 2.706  | 0.406  | -2.171 | 0.145  | 0.284  | -1.860 |
| AV;LG;GL;VA       | AV;LG;GL;VA_neg     | 3.572  | 3.423  | 0.396  | -2.339 | 1.091  | 0.945  | -0.918 |
| SV;VS             | SV;VS_neg           | 3.177  | 2.716  | 0.425  | -2.131 | 0.911  | 0.600  | -1.570 |
| PADK              | PADK_neg            | 1.854  | 1.779  | 0.755  | -1.427 | 0.466  | 0.264  | -0.690 |
| PVQ               | PVQ_neg             | 3.385  | 3.327  | 0.989  | -2.123 | 1.110  | -0.427 | -0.998 |
| VG;GV             | VG;GV_neg           | 3.269  | 3.341  | 0.409  | -3.327 | 0.834  | -0.427 | -1.530 |
| PTT;DAL           | PTT;DAL_neg         | 2.997  | 3.151  | 0.680  | -2.505 | 0.810  | -0.765 | -1.140 |
| PVN               | PVN_neg             | 3.882  | 3.787  | 1.263  | -3.022 | -0.895 | -0.748 | -1.067 |
| VN;NV;VGG         | VN;NV;VGG_neg       | 3.080  | 2.248  | 0.337  | -3.351 | 0.229  | 0.022  | -1.899 |
| PNA               | PNA_neg             | 1.836  | 3.164  | 0.636  | -3.595 | -0.158 | 0.293  | -1.481 |
| PAEF              | PAEF_neg            | 3.324  | 2.902  | 0.736  | -3.504 | 0.847  | 0.617  | 0.028  |
| KGHGK;GHGKK       | KGHGK;GHGKK_pos     | 0.002  | 0.669  | 0.371  | -1.723 |        | -3.327 | -0.592 |
| LK;KL             | LK;KL_pos           | 0.033  | 0.503  | -0.001 | -0.594 | 1.036  | -1.038 | -0.356 |
| NVL               | NVL_pos             |        | 1.797  | 2.381  | -1.161 | 6.665  | -3.584 | -0.175 |
| FK;KF             | FK;KF_pos           | 1.955  | 0.628  | 1.534  | -0.916 | -0.149 | -0.801 | 0.161  |
| TPDA              | TPDA_pos            | 1.797  | 0.447  | 1.856  | -0.996 | -0.324 | -0.699 | 0.446  |
| GKVG AHAG;AQVKGHG | GKVG AHAG;AQVKGHG_l | 4.545  | 2.851  | 3.962  | -1.087 | 0.325  | -2.298 | 1.867  |
| TPEEK;LSTPDA      | TPEEK;LSTPDA_pos    | 2.490  | 1.281  | 2.148  | -0.620 | 0.711  | -0.732 | 0.357  |
| SPAD              | SPAD_pos            | 1.529  | -0.145 | 1.210  | -0.591 | -1.304 | -0.940 | 0.247  |
| PPVQ              | PPVQ_pos            | 1.666  | 0.333  | 1.198  | -1.584 | -0.848 | -1.882 | -0.696 |
| PPVQA             | PPVQA_pos           | 2.012  | 0.876  | 1.116  | -1.795 | -0.731 | -1.433 | -0.292 |

|              |                  |        |        |        |        |        |        |        |
|--------------|------------------|--------|--------|--------|--------|--------|--------|--------|
| TPEE         | TPEE_pos         | 1.763  | 0.354  | 1.157  | -0.632 | -0.498 | -1.822 | 0.263  |
| DPVN         | DPVN_pos         | 2.260  | 0.537  | 1.856  | 1.138  | -0.861 | -1.325 | -0.566 |
| TPAVH        | TPAVH_neg        | 4.015  | 0.703  | 3.487  | 1.043  | -0.067 | -1.732 | -2.283 |
| NPKV         | NPKV_pos         | 2.754  | 1.881  | 2.556  | 0.122  | 0.704  | -1.131 | -0.766 |
| TPAVH        | TPAVH_pos        | 2.996  | 2.766  | 2.214  | 1.083  | 0.229  | -1.430 | -0.937 |
| DPVNF        | DPVNF_neg        | 3.796  | 2.507  | 3.264  | 1.312  | 0.039  | -2.124 | -2.221 |
| DPE          | DPE_pos          | 0.942  | -0.099 | 0.647  | -0.059 | -0.179 | -0.987 | -0.543 |
| DPENF        | DPENF_neg        | 5.319  | 3.712  | 4.931  | 1.524  | -5.698 | -6.260 | -4.429 |
| TPPVQ        | TPPVQ_neg        | 3.669  | 2.625  | 3.600  | 0.312  | -3.366 | -3.872 | -3.006 |
| VKGHG        | VKGHG_neg        | 2.035  | 2.343  | 4.042  | 0.378  | -2.430 | -2.903 | -3.968 |
| VAHVD        | VAHVD_pos        | 0.086  | 0.600  | 0.208  | -0.017 | -0.297 | -0.927 | -0.367 |
| DEVGGEA      | DEVGGEA_neg      | 2.564  | 3.191  | 1.573  | -1.079 | -0.573 | -6.346 | -1.420 |
| DPEN         | DPEN_neg         | 1.009  | 0.950  | 1.687  | 0.039  | -0.369 | -2.846 | -0.823 |
| HVDPEN       | HVDPEN_pos       | 1.684  | 3.276  | 0.825  | -0.094 | 0.143  | -2.266 | -1.747 |
| VDPVNF       | VDPVNF_neg       | 0.984  | 2.208  | 0.942  | -0.013 | 0.084  | -1.877 | -1.617 |
| DNLK         | DNLK_neg         | 2.059  | 2.258  | 0.266  | -0.710 | -0.424 | -1.753 | -1.799 |
| TLSELHCDKL   | TLSELHCDKL_neg   | 3.484  | 3.231  | 2.172  | -1.579 | 0.261  | -2.624 | -2.893 |
| TPEE         | TPEE_neg         | 2.401  | 1.997  | 3.252  | -3.849 | -1.548 | -3.059 | -3.854 |
| TPEEK;LSTPDA | TPEEK;LSTPDA_neg | 1.067  | 1.368  | 4.006  | -1.685 | -1.255 | -1.030 | -1.545 |
| LASVST       | LASVST_neg       | 2.652  | 3.796  | 4.894  | -3.495 | -0.863 | -3.188 | -1.779 |
| PAVH         | PAVH_neg         | 0.554  | 1.950  | 1.464  | -0.922 | -1.203 | -1.160 | -1.287 |
| PNALS        | PNALS_pos        | 1.594  | 0.767  | -0.738 | -1.376 | -0.826 | -0.577 | -0.382 |
| CLLVTLA      | CLLVTLA_pos      | 1.846  | 0.220  | -1.048 | -1.742 | -4.021 | -2.645 | -1.964 |
| PD;DP        | PD;DP_pos        | 0.619  | 0.563  | -0.368 | -0.416 | -0.708 | -0.789 | -0.839 |
| GEA          | GEA_pos          | 0.325  | 0.347  | -0.005 | -0.576 | -0.690 | -0.460 | -0.489 |
| KVGAHA       | KVGAHA_pos       | 1.554  | 1.051  | 0.052  | -1.135 | -1.485 | -1.599 | -1.417 |
| VDPEN        | VDPEN_pos        | 1.942  | 1.593  | 0.904  | -1.573 | -1.542 | -2.082 | -2.352 |
| TPEEKS       | TPEEKS_pos       | 1.062  | 1.304  | -0.031 | -0.620 | -0.744 | -0.586 | -0.335 |
| NL;VQ        | NL;VQ_neg        | 2.618  | 3.164  | 0.389  | -2.088 | -2.065 | -2.175 | -1.605 |
| VMGNPKVK     | VMGNPKVK_neg     | 2.246  | 3.793  | -0.117 | -2.992 | -4.292 | -3.573 | 0.283  |
| TYFP         | TYFP_pos         | 0.075  | 0.527  | -0.600 | -0.085 | 0.510  | -0.554 | -1.227 |
| VTALWG       | VTALWG_pos       | 0.046  | 0.714  | -0.320 | -1.315 | 0.541  | -0.993 | -4.236 |
| FE;EF        | FE;EF_pos        | 0.505  | 1.083  | -1.101 | -1.409 | -0.327 | -1.790 | -1.404 |
| SF;FS;AY     | SF;FS;AY_pos     | 0.332  | 0.493  | -1.211 | -0.504 | -0.345 | -1.251 | -1.428 |
| VHL;LHV      | VHL;LHV_pos      | -0.189 | 0.057  | -0.823 | -0.668 | -0.110 | -1.297 | -1.639 |
| VHL;LHV      | VHL;LHV_neg      | -0.329 | 0.305  | -1.965 | -3.082 | -0.889 | -2.616 | -2.940 |
| VDD          | VDD_neg          | -1.374 | 1.001  | 0.002  | -2.077 | 0.047  | -2.365 | -3.320 |
| VDD          | VDD_pos          | 0.802  | 0.487  | -0.265 | -1.888 | -0.793 | -1.394 | -1.207 |
| HL;LH        | HL;LH_pos        | 0.840  | 0.351  | -0.566 | -2.072 | -0.252 | -1.196 | -0.698 |
| DLS          | DLS_neg          | 0.588  | 1.035  | -0.738 | -2.993 | 0.181  | -2.381 | -2.118 |
| EV;DL;LD     | EV;DL;LD_neg     | 1.476  | 2.054  | 0.290  | -3.906 | -0.374 | -3.180 | -3.734 |
| VDE;DEV      | VDE;DEV_neg      | 1.452  | 1.897  | 0.509  | -3.428 | -0.538 | -3.773 | -3.958 |
| PE           | PE_neg           | 1.059  | 1.618  | 0.071  | -3.844 | -0.202 | -1.899 | -3.134 |
| HLD          | HLD_neg          | 1.194  | 0.240  | -0.386 | -2.502 | -0.113 | -2.301 | -2.591 |
| VDEVGGEALG   | VDEVGGEALG_neg   | 1.408  | 0.541  | 0.250  | -4.307 | -0.749 | -2.380 | -4.993 |



|                  |                    |        |        |        |        |        |        |        |
|------------------|--------------------|--------|--------|--------|--------|--------|--------|--------|
| AHLD             | AHLD_neg           | 1.562  | 2.785  | 0.480  | -1.413 | -0.841 | -0.643 | -2.750 |
| KTNV;TNVK        | KTNV;TNVK_neg      | 0.904  | 2.686  | 0.018  | -0.835 | 0.150  | -0.628 | -1.966 |
| PWTQ             | PWTQ_neg           | 1.747  | 2.537  | -0.041 | -2.071 | -0.493 | -1.568 | -2.249 |
| SA;GT            | SA;GT_neg          | 1.054  | 1.303  | -0.238 | -1.794 | 0.091  | -1.062 | -1.536 |
| VD               | VD_neg             | 1.900  | 2.403  | 0.792  | -1.849 | 0.076  | -1.544 | -2.533 |
| PDA              | PDA_neg            | 2.612  | 2.984  | 1.536  | -2.928 | -0.419 | -1.840 | -3.304 |
| GDLS;SDGL        | GDLS;SDGL_neg      | 2.066  | 2.674  | 1.284  | -2.312 | -0.091 | -1.817 | -2.559 |
| PEE              | PEE_neg            | 1.785  | 1.828  | 0.183  | -1.989 | 0.270  | -1.080 | -2.458 |
| PA               | PA_neg             | 2.274  | 2.099  | 0.719  | -2.746 | 0.260  | -1.323 | -2.274 |
| PVQA             | PVQA_neg           | 1.463  | 2.291  | 0.421  | -2.538 | -0.441 | -1.771 | -4.267 |
| PNALS            | PNALS_neg          | 2.809  | 2.906  | 0.687  | -3.453 | -1.216 | -1.492 | -4.473 |
| LV;VL            | LV;VL_neg          | 1.027  | 1.880  | -0.646 | -2.144 | -0.557 | -0.254 | -1.522 |
| VV               | VV_neg             | 1.853  | 1.829  | -1.002 | -3.002 | -0.498 | -0.473 | -1.845 |
| VNF              | VNF_neg            | 1.734  | 2.824  | 0.262  | -4.727 | -0.378 | -1.131 | -2.454 |
| SFG              | SFG_neg            | 0.435  | 1.409  | -0.395 | -0.108 | 0.109  | -1.957 | -1.657 |
| ESFG;AFSD        | ESFG;AFSD_neg      | 1.495  | 1.817  | 0.645  | -0.170 | -0.338 | -2.725 | -2.791 |
| DEVGGEALG        | DEVGGEALG_neg      | 3.235  | 3.218  | 2.327  | -1.524 | -1.793 | -3.555 | -5.334 |
| GGEAL;GEALG      | GGEAL;GEALG_neg    | 0.368  | 1.900  | 0.561  | -0.829 | -0.957 | -2.599 | -2.737 |
| PPVQA            | PPVQA_neg          | 0.900  | 1.613  | 1.443  | -2.188 | -0.793 | -2.893 | -3.338 |
| PPVQ             | PPVQ_neg           | 1.397  | 1.610  | 1.310  | -2.054 | -0.975 | -3.036 | -3.624 |
| VNVDEVG;EVGGEALG | VNVDEVG;EVGGEALG_n | 1.815  | 1.849  | 0.762  | -1.554 | -0.401 | -3.178 | -2.342 |
| PHFD             | PHFD_neg           | 2.678  | 3.508  | 1.504  | -3.262 | 0.286  | -4.853 | -4.537 |
| SFGD;FSDG        | SFGD;FSDG_neg      | 1.191  | 1.893  | -0.580 | -1.581 | -0.893 | -2.145 | -4.520 |
| NVDEVG           | NVDEVG_neg         | 0.534  | 0.924  | -0.878 | -1.149 | 0.081  | -2.233 | -3.012 |
| PD;DP            | PD;DP_neg          | 0.482  | 1.190  | -0.193 | -0.708 | 0.032  | -1.711 | -2.773 |
| STPDAVM          | STPDAVM_neg        | 1.078  | 1.354  | 0.176  | -2.062 | -0.731 | -4.225 | -5.754 |
| HVDD             | HVDD_neg           | 0.492  | 1.377  | 0.138  | -1.142 | -0.366 | -2.865 | -3.325 |
| DALT             | DALT_neg           | 0.834  | 1.475  | -0.245 | -2.170 | -0.223 | -2.133 | -3.700 |
| PVNF             | PVNF_neg           | 0.865  | 1.377  | -0.175 | -1.500 | -0.143 | -2.389 | -2.665 |
| ADALT            | ADALT_neg          | 0.853  | 0.524  | -0.050 | 0.728  | 0.106  | -2.365 | -2.740 |
| HFDLSHGSAQ       | HFDLSHGSAQ_neg     | 1.475  | 1.590  | 0.094  | 0.647  | -0.456 | -4.491 | -8.834 |
| EL               | EL_neg             | -0.050 | 1.046  | -0.011 | 0.337  | -0.358 | -0.376 | -0.442 |
| HFGKEFTPP        | HFGKEFTPP_neg      | -0.748 | 2.143  | 1.436  | -0.285 | -1.552 | -1.344 | -1.147 |
| VDEVGG           | VDEVGG_neg         | -1.991 | 3.414  | 0.841  | -1.928 | -1.686 | -2.244 | -2.604 |
| ESFGDLSTP        | ESFGDLSTP_pos      |        | -0.341 | -0.167 | 0.085  | 0.408  | 0.247  | -0.661 |
| FFESFGDL         | FFESFGDL_neg       | 5.698  | 1.139  | -1.773 | -3.501 | 1.350  | -1.167 | -5.430 |
| DPVN             | DPVN_neg           | 4.072  | -1.009 | -1.022 | 1.242  | 0.835  | -1.647 | -4.123 |

393 peptides were detected in either positive or negative mode. Blank spaces denote missing or undetectable values.
