# Supplementary material for: Piperaquine-resistant PfCRT mutations differentially impact drug transport, hemoglobin catabolism and parasite physiology in Plasmodium falciparum asexual blood stages
Source: PubMed Central journal article supplement (PMC9645663; doi:10.1371/journal.ppat.1010926), 2022-10-28
Supplement: ppat.1010926.s012.pdf [file ppat.1010926.s012.pdf]

**S4 Table. List of peptides showing significantly different levels in Dd2<sup>F145Icrt</sup> or Dd2<sup>G353Vcrt</sup> lines compared with Dd2<sup>Dd2crt</sup>. For each peptide, the length, number of isoforms, isoelectric point (IEP) and charge are shown.**

| Peptides            | Length | No. of isoforms | IEP          | Charge at pH 5.5 | Charge at pH 7.4 | P value | q value | Difference in                                                            |                                                                         |                                               | Fold change relative to Dd2 <sup>Dd2crt</sup> |                  |
|---------------------|--------|-----------------|--------------|------------------|------------------|---------|---------|--------------------------------------------------------------------------|-------------------------------------------------------------------------|-----------------------------------------------|-----------------------------------------------|------------------|
|                     |        |                 |              |                  |                  |         |         | Mean of log <sub>2</sub> -transformed peak area of Dd2 <sup>Dd2crt</sup> | Mean of log <sub>2</sub> -transformed peak area of Dd2 <sup>F145I</sup> | log <sub>2</sub> -transformed mean peak areas |                                               | SE of difference |
| DPENF               | 5      | 1               | 3.52         | -1.9             | -2               | <0.001  | 0.000   | 6.94                                                                     | 13.58                                                                   | 6.64                                          | 1.27                                          | 99.66            |
| PW                  | 2      | 1               | 5.99         | 0                | 0                | <0.001  | 0.000   | 6.90                                                                     | 13.34                                                                   | 6.44                                          | 1.27                                          | 86.82            |
| PWT                 | 3      | 1               | 5.95         | 0                | 0                | <0.001  | 0.000   | 6.56                                                                     | 12.72                                                                   | 6.16                                          | 1.27                                          | 71.41            |
| PENF                | 4      | 1               | 3.82         | -0.9             | -1               | <0.001  | 0.000   | 7.19                                                                     | 13.33                                                                   | 6.14                                          | 1.27                                          | 70.62            |
| PV                  | 2      | 1               | 5.94         | 0                | 0                | <0.001  | 0.000   | 7.45                                                                     | 13.56                                                                   | 6.11                                          | 1.27                                          | 68.83            |
| PAEF                | 4      | 1               | 3.86         | -0.9             | -1               | <0.001  | 0.000   | 5.59                                                                     | 11.52                                                                   | 5.93                                          | 1.27                                          | 60.93            |
| TPAVH               | 5      | 1               | 7.07         | 0.6              | 0                | <0.001  | 0.000   | 5.99                                                                     | 11.88                                                                   | 5.89                                          | 1.27                                          | 59.22            |
| NPKVK               | 5      | 1               | 8.18         | 2                | 1.9              | <0.001  | 0.000   | 5.21                                                                     | 13.28                                                                   | 8.07                                          | 1.79                                          | 268.91           |
| FPHFD               | 5      | 1               | 6.09         | -0.4             | -1               | <0.001  | 0.001   | 1.01                                                                     | 6.57                                                                    | 5.55                                          | 1.27                                          | 46.95            |
| VDEVG               | 5      | 1               | 3.55         | -1.9             | -2               | <0.001  | 0.001   | 3.90                                                                     | 9.35                                                                    | 5.45                                          | 1.27                                          | 43.83            |
| FFESFGDL            | 8      | 1               | 3.58         | -1.9             | -2               | <0.001  | 0.001   | 4.67                                                                     | 9.94                                                                    | 5.28                                          | 1.27                                          | 38.83            |
| TYF                 | 3      | 1               | 5.82         | 0                | 0                | <0.001  | 0.004   | 7.44                                                                     | 12.33                                                                   | 4.89                                          | 1.27                                          | 29.57            |
| VAGVANAL            | 8      | 1               | 5.82         | 0                | 0                | <0.001  | 0.005   | 12.66                                                                    | 7.29                                                                    | -5.37                                         | 1.42                                          | 0.02             |
| PAVH                | 4      | 1               | 7.16         | 0.6              | 0                | <0.001  | 0.006   | 7.72                                                                     | 12.46                                                                   | 4.74                                          | 1.27                                          | 26.74            |
| NL;VQ               | 2      | 2               | 5.821;5.8    | 86               | 0;0              | <0.001  | 0.011   | 5.43                                                                     | 10.48                                                                   | 5.05                                          | 1.42                                          | 33.22            |
| DGLA                | 4      | 1               | 3.63         | -1               | -1               | <0.001  | 0.011   | 7.54                                                                     | 12.06                                                                   | 4.51                                          | 1.27                                          | 22.83            |
| HFD                 | 3      | 1               | 5.24         | -0.4             | -1               | <0.001  | 0.012   | 8.47                                                                     | 12.91                                                                   | 4.44                                          | 1.27                                          | 21.72            |
| PK                  | 2      | 1               | 8.07         | 1                | 1                | <0.001  | 0.012   | 7.24                                                                     | 12.19                                                                   | 4.95                                          | 1.42                                          | 30.97            |
| VG;GV               | 2      | 2               | 5.827;5.8    | 23               | 0;0              | <0.001  | 0.013   | 11.00                                                                    | 15.38                                                                   | 4.39                                          | 1.27                                          | 20.92            |
| VCVLAH              | 6      | 1               | 7.24         | 0.6              | -0.4             | <0.001  | 0.015   | 3.80                                                                     | 9.91                                                                    | 6.12                                          | 1.79                                          | 69.41            |
| DKTNV               | 5      | 1               | 5.97         | 0                | 0                | <0.001  | 0.017   | 4.62                                                                     | 9.40                                                                    | 4.77                                          | 1.42                                          | 27.32            |
| PVN                 | 3      | 1               | 5.89         | 0                | 0                | 0.001   | 0.023   | 12.36                                                                    | 16.47                                                                   | 4.10                                          | 1.27                                          | 17.20            |
| EVG;GDL;STP;DAV;DGL | 3      | 5               | 3.764;3.6    | 33               | 1;-1             | 0.001   | 0.024   | 7.90                                                                     | 11.98                                                                   | 4.08                                          | 1.27                                          | 16.92            |
| FLSFP               | 5      | 1               | 76;5.795;    | 5.56             | 0                | 0.002   | 0.029   | 8.24                                                                     | 14.19                                                                   | 5.95                                          | 1.90                                          | 61.91            |
| PTT;DAL             | 3      | 2               | 3.631;3.6    | 4                | 0;-1             | 0.002   | 0.029   | 8.65                                                                     | 12.61                                                                   | 3.97                                          | 1.27                                          | 15.64            |
| HFDLSHGSAQ          | 10     | 1               | -0.9;-1;0;-  | 6.21             | 0.2              | 0.003   | 0.041   | 4.87                                                                     | 8.68                                                                    | 3.81                                          | 1.27                                          | 14.05            |
| AHVD                | 4      | 1               | -1;-1;0;-1;- | 6.40             | -0.4             | 0.003   | 0.041   | 7.84                                                                     | 11.63                                                                   | 3.79                                          | 1.27                                          | 13.83            |
| KVKAH               | 5      | 1               | 0;-1         | 8.16             | 2.6              | 0.003   | 0.041   | 13.69                                                                    | 9.45                                                                    | -4.23                                         | 1.42                                          | 0.05             |
| MP                  | 2      | 1               | 0;-1         | 5.90             | 0                | 0.003   | 0.046   | 8.22                                                                     | 11.95                                                                   | 3.73                                          | 1.27                                          | 13.22            |
| FTPAV               | 5      | 1               | 0;-1         | 5.84             | 0                | 0.003   | 0.046   | 15.19                                                                    | 8.76                                                                    | -6.43                                         | 2.19                                          | 0.01             |
| DPVN                | 4      | 1               | 0;-1         | 3.59             | -1               | 0.005   | 0.058   | 7.23                                                                     | 10.83                                                                   | 3.60                                          | 1.27                                          | 12.12            |
| PVNFKL              | 6      | 1               | 0;-1         | 8.02             | 1                | 0.005   | 0.059   | 10.40                                                                    | 6.02                                                                    | -4.38                                         | 1.55                                          | 0.05             |
| DEVGGEALG           | 9      | 1               | 0;-1         | 3.47             | -2.8             | 0.006   | 0.070   | 7.37                                                                     | 10.86                                                                   | 3.49                                          | 1.27                                          | 11.22            |
| HVDPENF             | 7      | 1               | 0;-1         | 4.22             | -1.3             | 0.006   | 0.070   | 3.82                                                                     | 7.31                                                                    | 3.49                                          | 1.27                                          | 11.21            |
| TPE                 | 3      | 1               | 0;-1         | 3.93             | -0.9             | 0.006   | 0.070   | 10.06                                                                    | 13.54                                                                   | 3.48                                          | 1.27                                          | 11.13            |
| LASVS               | 5      | 1               | 0;-1         | 5.67             | 0                | 0.006   | 0.070   | 5.41                                                                     | 10.59                                                                   | 5.19                                          | 1.90                                          | 36.40            |
| DPVNF               | 5      | 1               | 0;-1         | 3.59             | -1               | 0.007   | 0.071   | 8.33                                                                     | 11.77                                                                   | 3.44                                          | 1.27                                          | 10.87            |
| TPDAVMG             | 7      | 1               | 0;-1         | 3.64             | -1               | 0.007   | 0.073   | 5.90                                                                     | 9.31                                                                    | 3.41                                          | 1.27                                          | 10.65            |
| LASVST              | 6      | 1               | 0;-1         | 5.70             | 0                | 0.007   | 0.073   | 8.07                                                                     | 11.48                                                                   | 3.41                                          | 1.27                                          | 10.64            |
| NP                  | 2      | 1               | 0;-1         | 5.89             | 0                | 0.007   | 0.073   | 12.64                                                                    | 16.05                                                                   | 3.40                                          | 1.27                                          | 10.59            |
| SP                  | 2      | 1               | 0;-1         | 5.86             | 0                | 0.008   | 0.079   | 8.58                                                                     | 12.34                                                                   | 3.76                                          | 1.42                                          | 13.55            |
| NVDEVGGEALG         | 11     | 1               | 0;-1         | 3.50             | -2.8             | 0.008   | 0.080   | 8.33                                                                     | 11.67                                                                   | 3.35                                          | 1.27                                          | 10.19            |
| AV;LG;GL;VA         | 2      | 4               | 5.899;5.7    | 5.897            | 0;0;0;0          | 0.009   | 0.085   | 10.12                                                                    | 13.42                                                                   | 3.30                                          | 1.27                                          | 9.87             |
| VT;LS               | 2      | 2               | 65;5.768;    | 5.897;5.836      | 0;0              | 0.010   | 0.087   | 9.63                                                                     | 12.92                                                                   | 3.29                                          | 1.27                                          | 9.75             |
| TPPV                | 4      | 1               | 0;0          | 5.88             | 0                | 0.010   | 0.088   | 11.13                                                                    | 7.12                                                                    | -4.01                                         | 1.55                                          | 0.06             |
| TLSELHCDKL          | 10     | 1               | 0;0          | 5.82             | -0.3             | 0.011   | 0.093   | 9.26                                                                     | 12.49                                                                   | 3.24                                          | 1.27                                          | 9.42             |
| FTP                 | 3      | 1               | 0;0          | 5.78             | 0                | 0.011   | 0.093   | 8.40                                                                     | 11.63                                                                   | 3.23                                          | 1.27                                          | 9.39             |
| TPPVQ               | 5      | 1               | 0;0          | 5.91             | 0                | 0.012   | 0.098   | 6.50                                                                     | 9.70                                                                    | 3.20                                          | 1.27                                          | 9.20             |
| HGKKV               | 5      | 1               | 0;0          | 8.16             | 2.6              | 0.013   | 0.103   | 9.17                                                                     | 13.90                                                                   | 4.73                                          | 1.90                                          | 26.58            |
| HKLRVD              | 6      | 1               | 0;0          | 7.83             | 1.6              | 0.013   | 0.105   | 7.16                                                                     | 3.66                                                                    | -3.50                                         | 1.42                                          | 0.09             |
| LAHL                | 4      | 1               | 0;0          | 7.06             | 0.6              | 0.013   | 0.105   | 10.64                                                                    | 5.22                                                                    | -5.42                                         | 2.19                                          | 0.02             |
| PVQ                 | 3      | 1               | 0;0          | 5.87             | 0                | 0.014   | 0.110   | 14.16                                                                    | 17.26                                                                   | 3.11                                          | 1.27                                          | 8.60             |
| WTQ                 | 3      | 1               | 0;0          | 5.86             | 0                | 0.015   | 0.112   | 8.26                                                                     | 11.35                                                                   | 3.09                                          | 1.27                                          | 8.50             |
| PDAVM               | 5      | 1               | 0;0          | 3.64             | -1               | 0.017   | 0.129   | 10.17                                                                    | 13.18                                                                   | 3.02                                          | 1.27                                          | 8.08             |
| DPEN                | 4      | 1               | 0;0          | 3.53             | -1.9             | 0.018   | 0.131   | 10.43                                                                    | 13.43                                                                   | 3.00                                          | 1.27                                          | 8.01             |
| KGHGKK              | 6      | 1               | 0;0          | 8.21             | 3.6              | 0.018   | 0.131   | 13.00                                                                    | 9.66                                                                    | -3.35                                         | 1.42                                          | 0.10             |
| EVGGEA              | 6      | 1               | 0;0          | 3.59             | -1.8             | 0.019   | 0.133   | 8.35                                                                     | 11.33                                                                   | 2.98                                          | 1.27                                          | 7.89             |
| PNALS               | 5      | 1               | 0;0          | 5.90             | 0                | 0.019   | 0.135   | 10.43                                                                    | 13.40                                                                   | 2.97                                          | 1.27                                          | 7.81             |
| TPEE                | 4      | 1               | 0;0          | 3.67             | -1.8             | 0.020   | 0.136   | 10.62                                                                    | 13.58                                                                   | 2.96                                          | 1.27                                          | 7.76             |
| TP                  | 2      | 1               | 0;0          | 5.87             | 0                | 0.022   | 0.142   | 13.96                                                                    | 16.86                                                                   | 2.91                                          | 1.27                                          | 7.50             |
| HK                  | 2      | 1               | 0;0          | 7.99             | 1.6              | 0.023   | 0.146   | 9.24                                                                     | 12.13                                                                   | 2.89                                          | 1.27                                          | 7.41             |

Data were obtained were three independent experiments with technical triplicates. P values were calculated from unpaired t tests. q values represent the False Discovery Rate (FDR), as calculated using the two-stage step-up method of Benjamini, Krieger and Yekutieli.

| Peptides | Length | No. of isoforms | IEP  | Charge at pH 5.5 | Charge at pH 7.4 | P value | q value | Mean of log2-transformed peak area of | Mean of log2-transformed peak area of | Difference in log <sub>2</sub> -transformed mean peak areas | SE of difference | Fold change relative to |
|----------|--------|-----------------|------|------------------|------------------|---------|---------|---------------------------------------|---------------------------------------|-------------------------------------------------------------|------------------|-------------------------|
|          |        |                 |      |                  |                  |         |         | Dd2 <sup>Dd2crt</sup>                 | Dd2 <sup>G353V</sup>                  |                                                             |                  | Dd2 <sup>Dd2crt</sup>   |
| PV       | 2      | 1               | 5.94 | 0                | 0                | <0.001  | 0.028   | 7.45                                  | 13.84                                 | 6.39                                                        | 1.62             | 83.75                   |
| PW       | 2      | 1               | 5.99 | 0                | 0                | <0.001  | 0.028   | 6.90                                  | 13.22                                 | 6.32                                                        | 1.62             | 79.84                   |
| PENF     | 4      | 1               | 3.82 | -0.9             | -1               | <0.001  | 0.080   | 7.19                                  | 12.90                                 | 5.71                                                        | 1.62             | 52.42                   |
| PAEF     | 4      | 1               | 3.86 | -0.9             | -1               | <0.001  | 0.084   | 5.59                                  | 11.12                                 | 5.53                                                        | 1.62             | 46.30                   |
| VMGNPKVK | 8      | 1               | 8.16 | 2                | 1.9              | <0.001  | 0.084   | 4.72                                  | 10.08                                 | 5.36                                                        | 1.62             | 40.93                   |
| PWT      | 3      | 1               | 5.95 | 0                | 0                | 0.001   | 0.084   | 6.56                                  | 11.87                                 | 5.32                                                        | 1.62             | 39.86                   |
| RMF      | 3      | 1               | 8.61 | 1                | 1                | 0.001   | 0.104   | 8.91                                  | 16.64                                 | 7.73                                                        | 2.42             | 212.90                  |

Gray highlighting indicates peptides with altered abundance in both Dd2<sup>F145Icrt</sup> and Dd2<sup>G353V</sup>, compared with Dd2<sup>Dd2crt</sup>.

| Peptides                                  | Length | No. of isoforms | IEP | Charge at pH 5.5 | Charge at pH 7.4 | P value | q value | Mean log <sub>10</sub> of peak area of | Mean log <sub>10</sub> of peak area of | log <sub>10</sub> Difference | SE of difference | Fold change relative to |
|-------------------------------------------|--------|-----------------|-----|------------------|------------------|---------|---------|----------------------------------------|----------------------------------------|------------------------------|------------------|-------------------------|
|                                           |        |                 |     |                  |                  |         |         | Dd2 <sup>Dd2crt</sup>                  | Dd2 <sup>M343L</sup>                   |                              |                  | Dd2 <sup>Dd2crt</sup>   |
| No significant differences were observed. |        |                 |     |                  |                  |         |         |                                        |                                        |                              |                  |                         |
