# Supplementary material for: Piperaquine-resistant PfCRT mutations differentially impact drug transport, hemoglobin catabolism and parasite physiology in Plasmodium falciparum asexual blood stages
Source: PubMed Central journal article supplement (PMC9645663; doi:10.1371/journal.ppat.1010926), 2022-10-28
Supplement: ppat.1010926.s013.pdf [file ppat.1010926.s013.pdf]

**S5 Table. Differentially expressed genes identified from one-way ANOVA of Dd2<sup>F145Lcrt</sup>, Dd2<sup>G353Vcrt</sup>, Dd2<sup>M343Lcrt</sup> and the combined set of Dd2<sup>Dd2crt</sup> and Dd2 ( $p < 0.05$ ; with Bonferroni corrections and permutations).**

| Gene          | Description                                                                                                       | Dd2 repA | Dd2 repB | Dd2 <sup>Dd2crt</sup> repA | Dd2 <sup>Dd2crt</sup> repB | Dd2 <sup>M343Lcrt</sup> repA | Dd2 <sup>M343Lcrt</sup> repB | Dd2 <sup>M343Lcrt</sup> repC | Dd2 <sup>F145Lcrt</sup> repA | Dd2 <sup>F145Lcrt</sup> repB | Dd2 <sup>F145Lcrt</sup> repC | Dd2 <sup>G353Vcrt</sup> repA | Dd2 <sup>G353Vcrt</sup> repB | Dd2 <sup>G353Vcrt</sup> repC |
|---------------|-------------------------------------------------------------------------------------------------------------------|----------|----------|----------------------------|----------------------------|------------------------------|------------------------------|------------------------------|------------------------------|------------------------------|------------------------------|------------------------------|------------------------------|------------------------------|
| PF3D7_0418700 | PF3D7_0418700::RNA-binding protein NOB1, putative                                                                 | 0.389    | -0.121   | 0.179                      | -0.211                     | 0.089                        | -0.421                       | -0.521                       | 0.459                        | 1.579                        | 0.489                        | -0.651                       | -0.911                       | -0.351                       |
| PF3D7_1013500 | PF3D7_1013500::phosphoinositide-specific phospholipase C                                                          | -0.156   | -0.056   | -0.086                     | -0.016                     | 0.144                        | 0.014                        | -0.026                       | 0.144                        | 0.374                        | 0.254                        | -0.316                       | -0.146                       | -0.126                       |
| PF3D7_0818500 | PF3D7_0818500::zinc finger protein, putative                                                                      | -0.027   | 0.263    | 0.003                      | -0.217                     | -0.307                       | -0.427                       | -0.467                       | 0.213                        | 0.773                        | 0.213                        | 0.163                        | -0.007                       | -0.177                       |
| PF3D7_0403900 | PF3D7_0403900::SET domain protein, putative                                                                       | -0.088   | -0.108   | -0.208                     | -0.068                     | -0.188                       | -0.518                       | -0.208                       | 0.282                        | 0.442                        | 0.532                        | 0.102                        | 0.182                        | -0.148                       |
| PF3D7_1350500 | PF3D7_1350500::conserved Plasmodium protein, unknown function                                                     | -0.137   | -0.197   | -0.437                     | -0.257                     | 0.023                        | -0.107                       | 0.053                        | 0.063                        | 0.503                        | 0.363                        | 0.083                        | 0.113                        | -0.067                       |
| PF3D7_1232500 | PF3D7_1232500::CG2-related protein, putative                                                                      | -0.032   | -0.342   | -0.802                     | -0.532                     | -0.212                       | -0.552                       | -0.162                       | 0.718                        | 1.578                        | 0.538                        | 0.068                        | 0.108                        | -0.382                       |
| PF3D7_1467900 | PF3D7_1467900::rab GTPase activator, putative                                                                     | -0.279   | -0.189   | -0.379                     | -0.369                     | -0.019                       | -0.319                       | -0.229                       | 0.421                        | 1.181                        | 0.471                        | 0.041                        | -0.089                       | -0.239                       |
| PF3D7_0629900 | PF3D7_0629900::sec14-like cytosolic factor or phosphatidylinositol/phosphatidylcholine transfer protein, putative | 0.032    | 0.112    | 0.202                      | 0.302                      | -0.048                       | 0.012                        | 0.092                        | -0.168                       | -0.508                       | -0.098                       | 0.002                        | 0.052                        | 0.012                        |
| PF3D7_0425000 | PF3D7_0425000::Plasmodium exported protein, unknown function, pseudogene                                          | 1.559    | 1.849    | 1.389                      | 0.899                      | 0.159                        | -0.291                       | -0.991                       | -1.061                       | -0.771                       | -1.591                       | -0.441                       | -0.241                       | -0.471                       |
| PF3D7_0610500 | PF3D7_0610500::peptidyl-HRNA hydrolase PTRHD1, putative                                                           | -0.035   | 0.675    | 0.495                      | 0.645                      | 0.405                        | 0.065                        | -0.045                       | -0.465                       | -0.905                       | -0.645                       | -0.055                       | -0.075                       | -0.055                       |
| PF3D7_0309600 | PF3D7_0309600::60S acidic ribosomal protein P2                                                                    | 0.273    | 0.593    | 0.393                      | 0.453                      | 0.193                        | 0.193                        | -0.107                       | -0.417                       | -0.577                       | -0.467                       | -0.327                       | -0.147                       | -0.057                       |
| PF3D7_1038200 | PF3D7_1038200::conserved Plasmodium protein, unknown function                                                     | 0.206    | 0.946    | 0.526                      | 0.306                      | 0.216                        | -0.024                       | -0.164                       | -0.304                       | -0.634                       | -0.494                       | -0.204                       | -0.244                       | -0.134                       |
| PF3D7_0308500 | PF3D7_0308500::activator of Hsp90 ATPase, putative                                                                | 0.998    | 0.608    | 0.798                      | 0.408                      | 0.298                        | 0.158                        | -0.122                       | -0.592                       | -0.862                       | -0.722                       | -0.562                       | -0.292                       | -0.122                       |
| PF3D7_0310300 | PF3D7_0310300::phosphoglycerate mutase, putative                                                                  | 0.289    | 0.249    | 0.249                      | 0.139                      | 0.049                        | 0.019                        | -0.071                       | -0.301                       | -0.281                       | -0.271                       | -0.001                       | -0.121                       | 0.049                        |
| PF3D7_1228900 | PF3D7_1228900::conserved protein, unknown function                                                                | 0.364    | 0.474    | 0.684                      | 0.244                      | 0.184                        | 0.254                        | -0.066                       | -0.686                       | -0.776                       | -0.566                       | -0.096                       | -0.196                       | 0.184                        |
| PF3D7_1126400 | PF3D7_1126400::mediator of RNA polymerase II transcription subunit 21, putative                                   | 0.270    | 0.560    | 0.340                      | 0.200                      | 0.090                        | 0.170                        | 0.070                        | -0.560                       | -0.320                       | -0.500                       | -0.180                       | -0.200                       | 0.060                        |
| PF3D7_0706400 | PF3D7_0706400::60S ribosomal protein L37                                                                          | 0.308    | 0.688    | 0.178                      | 0.128                      | 0.158                        | 0.398                        | 0.058                        | -0.462                       | -0.602                       | -0.332                       | -0.332                       | -0.242                       | 0.058                        |
| PF3D7_1122000 | PF3D7_1122000::conserved protein, unknown function                                                                | 0.208    | 0.908    | 0.388                      | 0.398                      | 0.338                        | 0.758                        | 0.308                        | -0.832                       | -0.952                       | -0.572                       | -0.532                       | -0.522                       | 0.098                        |
| PF3D7_0313100 | PF3D7_0313100::ubiquitin-protein ligase, putative                                                                 | 0.024    | 0.354    | 0.304                      | 0.194                      | 0.134                        | 0.374                        | 0.124                        | -0.296                       | -0.906                       | -0.356                       | -0.056                       | -0.066                       | 0.174                        |
| PF3D7_0933600 | PF3D7_0933600::mitochondrial-processing peptidase subunit beta, putative                                          | 0.238    | 0.328    | 0.428                      | 0.228                      | 0.048                        | 0.438                        | 0.108                        | -0.242                       | -1.082                       | -0.392                       | -0.052                       | -0.132                       | 0.088                        |
| PF3D7_0807000 | PF3D7_0807000::YEATS domain-containing protein, putative                                                          | 0.143    | 0.363    | 0.163                      | 0.333                      | 0.243                        | 0.603                        | 0.193                        | -0.267                       | -0.937                       | -0.457                       | -0.197                       | -0.257                       | 0.073                        |
| PF3D7_1308200 | PF3D7_1308200::carbamoyl phosphate synthetase                                                                     | 0.374    | 0.424    | 0.354                      | 0.274                      | 0.244                        | 0.344                        | 0.194                        | -0.436                       | -0.846                       | -0.326                       | -0.396                       | -0.386                       | 0.184                        |
| PF3D7_1132200 | PF3D7_1132200::T-complex protein 1 subunit alpha                                                                  | 0.324    | 0.374    | 0.654                      | 0.334                      | 0.354                        | 0.404                        | 0.034                        | -0.546                       | -0.976                       | -0.486                       | -0.406                       | -0.276                       | 0.214                        |
| PF3D7_1424100 | PF3D7_1424100::60S ribosomal protein L5, putative                                                                 | 0.418    | 0.548    | 0.588                      | 0.308                      | 0.258                        | 0.428                        | -0.072                       | -0.522                       | -1.052                       | -0.432                       | -0.392                       | -0.112                       | 0.038                        |
| PF3D7_1323100 | PF3D7_1323100::60S ribosomal protein L6, putative                                                                 | 0.111    | 0.291    | 0.421                      | 0.361                      | 0.151                        | 0.401                        | -0.019                       | -0.259                       | -0.669                       | -0.459                       | -0.179                       | -0.169                       | 0.021                        |
| PF3D7_1459700 | PF3D7_1459700::pyridoxal 5'-phosphate synthase, putative                                                          | 0.288    | 0.428    | 0.548                      | 0.568                      | 0.258                        | 0.498                        | 0.018                        | -0.502                       | -0.962                       | -0.492                       | -0.302                       | -0.302                       | -0.052                       |
| PF3D7_1226500 | PF3D7_1226500::heptatricopeptide repeat and RAP domain-containing protein, putative                               | 0.169    | 0.219    | 0.309                      | 0.059                      | 0.079                        | 0.259                        | 0.179                        | -0.291                       | -0.351                       | -0.371                       | -0.091                       | -0.191                       | 0.019                        |
| PF3D7_0520600 | PF3D7_0520600::bis(5'-nucleosyl)-tetraphosphatase [asymmetrical]                                                  | 0.328    | 0.528    | 0.208                      | 0.308                      | 0.208                        | 0.438                        | 0.128                        | -0.712                       | -0.782                       | -0.672                       | -0.022                       | -0.112                       | 0.148                        |
| PF3D7_1360400 | PF3D7_1360400::conserved Plasmodium protein, unknown function                                                     | 0.215    | 0.615    | 0.375                      | 0.315                      | 0.225                        | 0.335                        | 0.135                        | -0.475                       | -0.835                       | -0.645                       | -0.125                       | -0.255                       | 0.115                        |
| PF3D7_1427800 | PF3D7_1427800::exosome complex component RRP41                                                                    | 0.069    | 0.489    | 0.499                      | 0.289                      | 0.129                        | 0.209                        | 0.289                        | -0.721                       | -0.851                       | -0.631                       | 0.089                        | -0.061                       | 0.199                        |
| PF3D7_0605000 | PF3D7_0605000::50S ribosomal protein L24, putative                                                                | 0.160    | 0.260    | 0.570                      | 0.460                      | 0.050                        | 0.100                        | 0.110                        | -0.380                       | -0.610                       | -0.600                       | 0.150                        | -0.250                       | -0.020                       |
| PF3D7_1364800 | PF3D7_1364800::DNA-directed RNA polymerases I, II, and III subunit RPABC1, putative                               | 0.396    | 0.306    | 0.936                      | 0.626                      | 0.136                        | 0.146                        | 0.186                        | -0.794                       | -0.934                       | -0.794                       | -0.354                       | -0.254                       | 0.396                        |
| PF3D7_1205600 | PF3D7_1205600::tetraatricopeptide repeat protein, putative                                                        | 0.029    | 0.259    | 0.479                      | 0.199                      | 0.279                        | 0.079                        | 0.099                        | -0.261                       | -1.011                       | -0.311                       | 0.039                        | -0.071                       | 0.189                        |
| PF3D7_0614500 | PF3D7_0614500::60S ribosomal protein L19                                                                          | 0.097    | 0.667    | 0.947                      | 0.367                      | 0.137                        | -0.013                       | -0.013                       | -0.413                       | -1.083                       | -0.523                       | -0.033                       | -0.283                       | 0.147                        |
| PF3D7_1309100 | PF3D7_1309100::60S ribosomal protein L24, putative                                                                | 0.138    | 0.558    | 0.828                      | 0.388                      | 0.248                        | -0.102                       | -0.162                       | -0.432                       | -0.802                       | -0.492                       | -0.112                       | -0.152                       | 0.088                        |
| PF3D7_1445700 | PF3D7_1445700::conserved Plasmodium protein, unknown function                                                     | 0.124    | 0.234    | 0.884                      | 0.324                      | 0.154                        | 0.084                        | -0.046                       | -0.506                       | -0.866                       | -0.376                       | -0.056                       | -0.186                       | 0.234                        |
| PF3D7_1247100 | PF3D7_1247100::conserved protein, unknown function                                                                | 0.115    | 0.555    | 0.235                      | 0.075                      | -0.135                       | -0.055                       | -0.045                       | -0.355                       | -0.515                       | -0.175                       | 0.105                        | 0.105                        | 0.085                        |
| PF3D7_1346500 | PF3D7_1346500::conserved Plasmodium protein, unknown function                                                     | 0.119    | 0.899    | 0.459                      | 0.309                      | -0.021                       | 0.019                        | -0.101                       | -0.471                       | -0.911                       | -0.401                       | 0.059                        | -0.121                       | 0.159                        |

Shown are the mean-centered log<sub>2</sub> ratios of each sample against a 3D7 reference pool.
