# Supplementary material for: Piperaquine-resistant PfCRT mutations differentially impact drug transport, hemoglobin catabolism and parasite physiology in Plasmodium falciparum asexual blood stages
Source: PubMed Central journal article supplement (PMC9645663; doi:10.1371/journal.ppat.1010926), 2022-10-28
Supplement: ppat.1010926.s015.pdf [file ppat.1010926.s015.pdf]

**S7 Table. *In vitro* 72 hr susceptibility of *pfcr*t-edited lines against hemoglobinase or aminopeptidase inhibitors.**

| Parasite Line           | MMV1557817            |                       | E64                   |                       | ALLN                  |                       | Pepstatin             |                       |
|-------------------------|-----------------------|-----------------------|-----------------------|-----------------------|-----------------------|-----------------------|-----------------------|-----------------------|
|                         | IC <sub>50</sub> (nM) | IC <sub>90</sub> (nM) | IC <sub>50</sub> (nM) | IC <sub>90</sub> (nM) | IC <sub>50</sub> (nM) | IC <sub>90</sub> (nM) | IC <sub>50</sub> (nM) | IC <sub>90</sub> (nM) |
| Dd2 <sup>Dd2crt</sup>   | 27.5 ± 1.2            | 68.4 ± 3.2            | 2349 ± 47.8           | 4468 ± 463.9          | 40.4 ± 1.7            | 256 ± 13.7            | 40071 ± 3102          | 91343 ± 6918          |
| Dd2 <sup>F145lcr</sup>  | 17.4 ± 2.5 *          | 57.1 ± 2.4            | 2535 ± 75.2           | 5320 ± 242.3          | 36.3 ± 1.9            | 250 ± 14.1            | 35830 ± 2500          | 80223 ± 7969          |
| Dd2 <sup>M343Lcrt</sup> | 18.3 ± 0.8 *          | 56.3 ± 2.9            | 2509 ± 38.4           | 5006 ± 253.1          | 45.3 ± 3.1            | 276 ± 14.4            | 42410 ± 3292          | 87920 ± 6995          |
| Dd2 <sup>G353Vcrt</sup> | 14.1 ± 1.2 *          | 50.6 ± 2.7            | 2523 ± 39.4           | 4960 ± 207            | 40.5 ± 2.1            | 301 ± 37.8            | 43887 ± 2860          | 89858 ± 6674          |
| Dd2 <sup>3D7crt</sup>   | 26.4 ± 1.0            | 70.2 ± 3.6            | 2403 ± 64.8           | 4965 ± 206            | 45.3 ± 5.3            | 274 ± 19.9            | 41786 ± 2520          | 93596 ± 5993          |

Data show means ± SEM, calculated from four independent experiment with technical duplicates. Significance was determined using Mann-Whitney U tests. \*p<0.05. MMV1557817 is also known as MIPS-1778.
